# Supplementary material for: Elevated WTAP promotes hyperinflammation by increasing m6A modification in inflammatory disease models
Source: JCI journal article supplement (doi:10.1172/jci177932), 2024-05-16
Supplement: sd1 [file 1]

## **Supplemental Materials for**

### **Elevated WTAP promotes hyperinflammation by increasing m<sup>6</sup>A modification in inflammatory disease models**

Yong Ge, Rong Chen, Tao Ling, Biaodi Liu, Jingrong Huang, Youxiang Cheng, Yi Lin, Hongxuan  
Chen, Xiongmei Xie, Guomeng Xia, Guanzheng Luo, Shaochun Yuan & Anlong Xu

Correspondence to:

Anlong Xu

[lssxal@mail.sysu.edu.cn](mailto:lssxal@mail.sysu.edu.cn)

Guangzhou 510275, China

P: 086-020-39332990

Or to:

Shaochun Yuan

[yuanshch@mail.sysu.edu.cn](mailto:yuanshch@mail.sysu.edu.cn)

Guangzhou 510275, China

P: 086-020-84114373

## Supplemental Methods

**Reagents.** Reagents used are listed in Supplementary Table 4.

**Cells.** The 293T, HeLa and THP-1 cell lines were purchased from ATCC. All these cells were cultured in endotoxin-free DMEM or RPMI-1640, supplemented with 10% FBS and 1% penicillin–streptomycin. PBMCs and BMDMs were isolated and cultured as described previously (1).

**Generation of knockout THP-1 cells.** Knockout (KO) cells were constructed using the CRISPR/Cas9 system. Small guide RNAs (gRNAs) targeting the genome sequence of target genes were designed using an online gRNA design tool (by Zhang Feng laboratory, <http://crispr.mit.edu/>), and subcloned into the lentiCRISPR v2 vector. This vector was transfected into the HEK293T cells along with the following two lentiviral packing plasmids: psPAX2 and pVSV-G. The culture supernatants were collected at 48 and 60 hours after transfection and concentrated by ultracentrifugation before use for infection. The infection-positive (GFP<sup>+</sup>) cells were selected by flow cytometry, monoclonal cells were confirmed by genomic sequencing and immunoblotting analysis with the corresponding antibody. The gRNA sequences used for generating the KO cells are listed in Supplementary Table 3.

**In vivo LPS challenge.** For endotoxicity studies, age-matched *Wtap*<sup>fl/fl</sup> and *LyzM-cre*<sup>+</sup> *Wtap*<sup>Δ1-77</sup> mice (8 weeks old) were intraperitoneally injected with LPS (40 mg kg<sup>-1</sup>). Mouse survival was monitored every 4 hr.

*Wtap*<sup>fl/fl</sup> and *LyzM-cre*<sup>+</sup> *Wtap*<sup>Δ1-77</sup> mice (8 weeks old) were intraperitoneally injected with LPS (10 mg kg<sup>-1</sup>) or isodose PBS. After 12 hr, the mice were killed, blood was collected, and serum levels of IL-6 were measured by ELISA. Lung and colon tissues were collected, and RNA samples were extracted for qRT-PCR to determine the mRNA levels of inflammatory cytokines.

*Wtap*<sup>fl/fl</sup> and *LyzM-cre*<sup>+</sup> *Wtap*<sup>Δ1-77</sup> mice (8 weeks old) were intraperitoneally injected with LPS (10 mg kg<sup>-1</sup>) or PBS. After 6 hr, the mice were killed, and lungs from control or LPS-stimulated mice were dissected, fixed in 4% paraformaldehyde (PFA) embedded in paraffin, sectioned, stained with hematoxylin and eosin (H&E) solution, and examined by light microscopy to detect histological changes.

*Wtap*<sup>fl/fl</sup> and *LyzM-cre*<sup>+</sup> *Wtap*<sup>Δ1-77</sup> mice (8 weeks old) were intraperitoneally injected with *P. aeruginosa* (ATCC27853, 2 × 10<sup>8</sup> CFU) or *L. monocytogenes* (ATCC19116, 1 × 10<sup>8</sup> CFU) or PBS. After 16 hr, the mice were killed, and the related phenotypes were measured as described above.

**In vitro recombinant protein expression and purification.** The expressing plasmids (pET-32a) encoding WTAP conjugated eGFP and METTL3 conjugated mCherry were transformed into BL21 *E.coli*. *E.coli* were cultured in LB with Ampicillin (50 µg/mL) at 37 °C for about 12 hr till OD<sub>600</sub> = 0.6. After induction with 1 mM IPTG at 37 °C for 8 hr, the cultured *E.coli* was harvested by centrifugation at 4000 rpm, 4 °C, 10 min and resuspended in lysis buffer. Cells were lysed by sonication on ice and centrifuged (12,000 rpm, 30 min, 4 °C) to remove debris and collected the supernatant. The supernatant was purified by incubation with Ni-NTA agarose beads (QIAGEN) overnight at 4 °C. Then, Ni-NTA beads were washed with wash buffer (50 mM NaH<sub>2</sub>PO<sub>4</sub>, 300 mM NaCl, 20 mM imidazole, pH 7.8), and proteins were eluted with elution buffer (50 mM NaH<sub>2</sub>PO<sub>4</sub>, 300 mM NaCl, 300 mM imidazole, pH 7.8). The purified proteins were further dialyzed by using PD10 column (GE Healthcare), and concentrated using Amicon Ultra 30 K (Millipore) concentrators at 4 °C. Concentrated proteins were quantified by the BCA method (Thermo Fisher) and stored at -80 °C.

**ELISA assays and quantitative RT-PCR (qRT-PCR).** The concentrations of IL-6, IL-1β and TNF-α in culture supernatants were measured using kits from R&D Systems or Proteintech, according to the manufacturer's instructions.

Total RNA was extracted using TRIzol reagent (Invitrogen) and reversed-transcribed with a PrimeScript<sup>TM</sup> RT reagent kit with gDNA Eraser (TaKaRa) according to the manufacturer's instructions. And 2×Polarsignal<sup>®</sup> qPCR mix (MIKX) was used for quantitative real-time PCR analysis. The data were normalized by the level of *GAPDH* or *ACTB* expression in each individual sample, and primer sequences used are listed in Supplementary Table 3.

**Luciferase reporter gene assay.** For a promoter reporter gene assay, 293T cells were plated in 48-well plates and transiently transfected with WTAP promoter reporter (pGL3 basic plasmid), with increasing doses of Flag-tagged NF-κB p65, IRF3 or C/EBPβ and 7.5 ng of the *Renilla* luciferase reporter vector using Lipofectamine 2000. At 24 hrs post-transfection, luciferase activities were measured with a dual-luciferase reporter assay system (Promega) according to the manufacturer's instructions. Reporter gene activity was determined by normalization of Firefly luciferase activity to *Renilla* luciferase activity.

For other reporter gene assays, wild-type and *WTAP*<sup>Δ1-20</sup> 293T cells or wild-type *WTAP*<sup>Δ1-77</sup> THP-1 cells were plated in 48-well plates and transiently transfected with the indicated reporter vectors

(psiCHECK<sup>TM</sup>-2) expressing wild-type or mutated UTRs of *IL6ST* using Lipofectamine 2000. At 24 hrs post-transfection, the luciferase activities were measured as above. Reporter gene activity was determined by normalization of the *Renilla* luciferase activity to Firefly luciferase activity.

**RNA decay assay.** *WTAP*<sup>Δ1-77</sup> and WT THP-1 cells were seeded at a density of  $8 \times 10^5$  cells/mL in 12-well plates. After treatment with PMA (50 ng/mL, Sigma), the cells were treated with transcription inhibitor Act D (5 μg/mL, Sigma) to block *de novo* RNA synthesis, and collected at different times. RNA samples were extracted for qRT-PCR to determine the mRNA levels of the indicated genes.

**Fluorescence recovery after photobleaching (FRAP) assay.** FRAP assay was conducted by Leica TCS SP8 STED 3X confocal microscopy. 488- or 568-nm laser beam was used to bleach the fluorescent protein at a region of interest (ROI), followed with collecting time-lapse images. Fluorescence intensity of indicated ROI was measured and normalized to the fluorescence intensity of pre-bleaching image by Leica AS Lite.

**Laser scanning confocal microscopy (LSCM).** Cells for fluorescence experiments were cultured in glass bottom culture dishes (Nest Scientific). After treated with indicated stimulation, cells were fixed by 4% paraformaldehyde for 10 min, followed with 3 times wash with PBS. Then, cells were permeabilized with methyl alcohol for 30 min at -20 °C and rinsed with PBS for 3 times. After blocking in 5% goat serum for 1 h at room temperature, cells were incubated with primary antibodies at 4 °C, overnight. 1 × PBST (PBS with 0.1% Tween20) was used to wash the cells for 3 times and subsequently incubated with fluorescently labeled secondary antibodies at room temperature for 1 h. Confocal images were obtained by Leica TCS SP8 STED 3X confocal microscope. The number of condensates were counted and analyzed by ImageJ software.

**Live-cell imaging.** At 24 hrs post-transfection incubation, cells were loaded into temperature- and CO<sub>2</sub>-controlled live-cell imaging chamber of Leica TCS SP8 STED 3X confocal microscope. Cells were imaged typically by use of 2 laser wavelengths (488 nm for eGFP imaging and 560 nm for mCherry imaging).

**In vitro phase separation assay.** The purified recombinant proteins were mixed at indicated concentration with LLPS buffer and 5% PEG8000 at 37 °C. The mixture was pipetted onto glass bottom dish and imaged by Leica TCS SP8 STED 3X confocal microscope equipped with 100 × 1.40 NA oil objectives.

**m<sup>6</sup>A dot blots.** Total RNA was extracted with TRIzol reagent. Equal amounts of RNA (300 ng) were denatured at 95 °C for 3 min. The samples were immediately chilled on ice, added to a positively charged nylon membrane (PALL), and then cross-linked with a UV crosslinker. After blocking and incubating with the m<sup>6</sup>A antibody (CST) overnight, the membrane was incubated with the secondary antibody at room temperature for 1 hr. Signals were detected using a chemiluminescence imaging system. Methylene blue in 0.3 M sodium acetate (pH 5.2) was used to indicate the amount of total RNA.

**RNA immunoprecipitation assay (RIP).** RIP was conducted using a RIP assay Kit (MBL) following the manufacturer's instructions. In brief, Protein A/G magnetic beads coated with 5 µg of specific antibody or normal IgG were incubated with cell lysates at 4 °C overnight. Proteins were then extracted for immunoblot analysis, and the co-precipitated RNAs were isolated by elution buffer and purified by TRIzol reagent, and subsequently subjected to qRT-PCR analysis.

**DNA/RNA pull-down assay.** Biotin-labeled DNA and RNA probes were synthesized by RiboBio. For DNA pull-down assay, Flag-tagged NF-κB p65 expression constructs were transfected into 293T cells. At 24 hrs post-transfection, whole cell lysates were extracted from 293T cells using IP lysis buffer. Biotin-coupled DNA-protein complex was pulled down by incubating whole cell lysates with high-capacity streptavidin agarose beads (Thermo Fisher) according to the manufacturer's instructions. The bound proteins were eluted and used for immunoblot analysis. For RNA pull-down assay, biotin-coupled RNA complex was pulled down by incubating cell lysates with high-capacity streptavidin agarose beads, bound proteins were then extracted for immunoblot analysis.

**Quantification of the m<sup>6</sup>A modification by LC-MS/MS.** The 200ng extracted mRNA was digested into nucleosides by Nuclease P1 (1 U, NEB, M0660S) and shrimp alkaline phosphatase (rSAP, 1 U, NEB, M0371S) in 50 µL RNase-free water at 37 °C overnight. The mixture was diluted to 100 µL, 10 µL of which was injected into an LC-MS/MS system consisting of a high-performance liquid chromatographer (Shimadzu) equipped with a C18-T column (Weltech) and a Triple Quad 4500 (AB SCIEX) mass spectrometer in positive ion mode by multiple-reaction monitoring. Mass transitions of m/z 268.0–136.0 (A), m/z 245.0–113.1 (U), m/z 244.0–112.1 (C), m/z 284.0–152.0 (G) and m/z 282.0–150.1 (m<sup>6</sup>A) were monitored. A concentration series of pure commercial nucleosides (MCE) was employed to generate standard curves. The concentration of nucleosides in

samples were obtained by fitting signal intensity to a standard curve with certain ratios calculated subsequently.

**RNA-seq and data analysis.** Whole-cell total RNA was isolated using TRIzol reagent and quantified using a NanoDrop 2000 spectrophotometer (Thermo). The cDNA library was constructed by Biomarker Technologies. Sequencing was performed on an Illumina HiSeq 2500 platform. High-quality reads were mapped to the human reference genome (hg19) or mouse reference genome (mm9) using HISAT2. DESeq, an R package, was applied for differential gene expression analysis. We filtered the differentially expressed genes based on a false discovery rate (FDR)  $<0.05$ .

## Supplemental data

### Characterizations of WTAP-deficient cells

To determine the function of WTAP in inflammatory responses, we first generated *WTAP*-knockout THP-1 cells using the CRISPR/Cas9 approach. Two sgRNAs were designed to target the second and third exons (E2 and E3) of *WTAP*. sgRNA#1 caused a two-base insertion, whereas sgRNA#2 caused a one-base deletion in the *WTAP* genomic locus (Supplementary Figure 3, A and B), leading to the introduction of a new stop codon upstream of the CDS and resulting in the early termination of WTAP translation. However, based on the predicted open reading frame (ORF), cells may skip these mutations by initiating translation at an alternative site to produce alternative WTAP isoforms of 376 and 319 aa, respectively (Supplementary Figure 3C). A subsequent immunoblotting assay using a monoclonal antibody (mAb) purchased from Abcam confirmed the extremely low expression of these two isoforms (Supplementary Figure 3D). Thus, the cell lines were designated “*WTAP* <sup>$\Delta$ 1-20</sup> THP-1 cells” and “*WTAP* <sup>$\Delta$ 1-77</sup> THP-1 cells”. In addition to generating WTAP-deficient THP-1 cells, we also used the same sgRNAs to knock out WTAP in 293T cells and successfully obtained clones using sgRNA#1. Genomic sequencing confirmed that sgRNA#1 targeted the second exon and introduced a four-base deletion, also resulting in the early termination of WTAP translation. However, similar to what occurred in *WTAP* <sup>$\Delta$ 1-20</sup> THP-1 cells, the truncated *WTAP* <sup>$\Delta$ 1-20</sup> isoform may be produced and was rarely expressed in 293T knockout cells (Supplementary Figure 3, E-G); thus, the cells were designated “*WTAP* <sup>$\Delta$ 1-20</sup> 293T cells”.

### Characterizations of WTAP conditional KO mice

We next generated the *Wtap* conditional KO (CKO) mice by crossing *Wtap*<sup>fl<sup>ox</sup>/fl<sup>ox</sup></sup> mice with mice expressing Cre recombinase under the control of the lysozyme 2 promoter (*LyzM*-Cre) (Supplementary Figure 3H). Genomic sequencing confirmed that the third exon was fully removed after crossing, which also resulted in the early termination of WTAP translation (Supplementary Figure 3, I and J). Similarly, the ORF prediction revealed that gene-edited BMDMs may also produce alternative WTAP isoforms with 319 aa (Supplementary Figure 3J). However, none of the purchased antibodies targeting WTAP could identify this predicted isoform (Supplementary Figure 3, K and L). Although commercially available antibodies for detection are not sufficient, the expression of *WTAP* <sup>$\Delta$ 1-77</sup> should be extremely low in BMDMs if it is present, as we have previously observed in THP-1 cells.

### Functional deficiency of truncated WTAP<sup>Δ1-20</sup> and WTAP<sup>Δ1-77</sup>

WTAP possesses a nuclear localization signal (NLS) at its N-terminus (Supplementary Figure 3C), and mutation of this signal can affect the entry of the protein into the nucleus and its function (2). Since the NLS is missing in both alternative isoforms, the entry of these isoforms into the nucleus may be affected. Nuclear–cytoplasmic extraction assays confirmed that WTAP<sup>Δ1-20</sup> and WTAP<sup>Δ1-77</sup> were more concentrated in the cytoplasm (Supplementary Figure 3, M and N). Moreover, LC–MS/MS assays indicated that ectopic expression of full-length WTAP but not the two alternative isoforms in *WTAP<sup>Δ1-20</sup>* 293T cells could increase the global m<sup>6</sup>A modification level (Supplementary Figure 3O). Similarly, the m<sup>6</sup>A modification levels in *WTAP<sup>Δ1-20</sup>* and *WTAP<sup>Δ1-77</sup>* THP-1 cells were lower than those in wild-type cells (Supplementary Figure 3P), and the same trend was observed in BMDMs from *LyzM-Cre<sup>+</sup> Wtap<sup>Δ1-77</sup>* mice (Supplementary Figure 3Q). Due to the extremely low expression and the severely impaired function of WTAP<sup>Δ1-20</sup> and WTAP<sup>Δ1-77</sup>, the status of *WTAP<sup>Δ1-20</sup>* and *WTAP<sup>Δ1-77</sup>* cells should be very close to that of cells in which the protein is completely knocked out. Due to the extremely low expression and severely impaired function of WTAP<sup>Δ1-20</sup> and WTAP<sup>Δ1-77</sup>, the status of *WTAP<sup>Δ1-20</sup>* and *WTAP<sup>Δ1-77</sup>* cells should be very similar to that of cells in which the protein is completely deleted.

Additionally, no differences in the proportions of major immune cell populations were observed between *Wtap<sup>fl/fl</sup>* and *LyzM-Cre<sup>+</sup> Wtap<sup>Δ1-77</sup>* mice in the steady state (Supplementary Figure 4, A–C), indicating that the depletion of *Wtap* in myeloid cells did not affect macrophage development or maturation.

### References

1. Ge Y, et al. Degradation of WTAP blocks antiviral responses by reducing the m<sup>6</sup>A levels of IRF3 and IFNAR1 mRNA. *EMBO Rep.* 2021;22(11):e52101.
2. Scholler E, et al. Interactions, localization, and phosphorylation of the m<sup>6</sup>A generating METTL3-METTL14-WTAP complex. *RNA.* 2018;24(4):499-512.



## Supplemental figures and figure legends

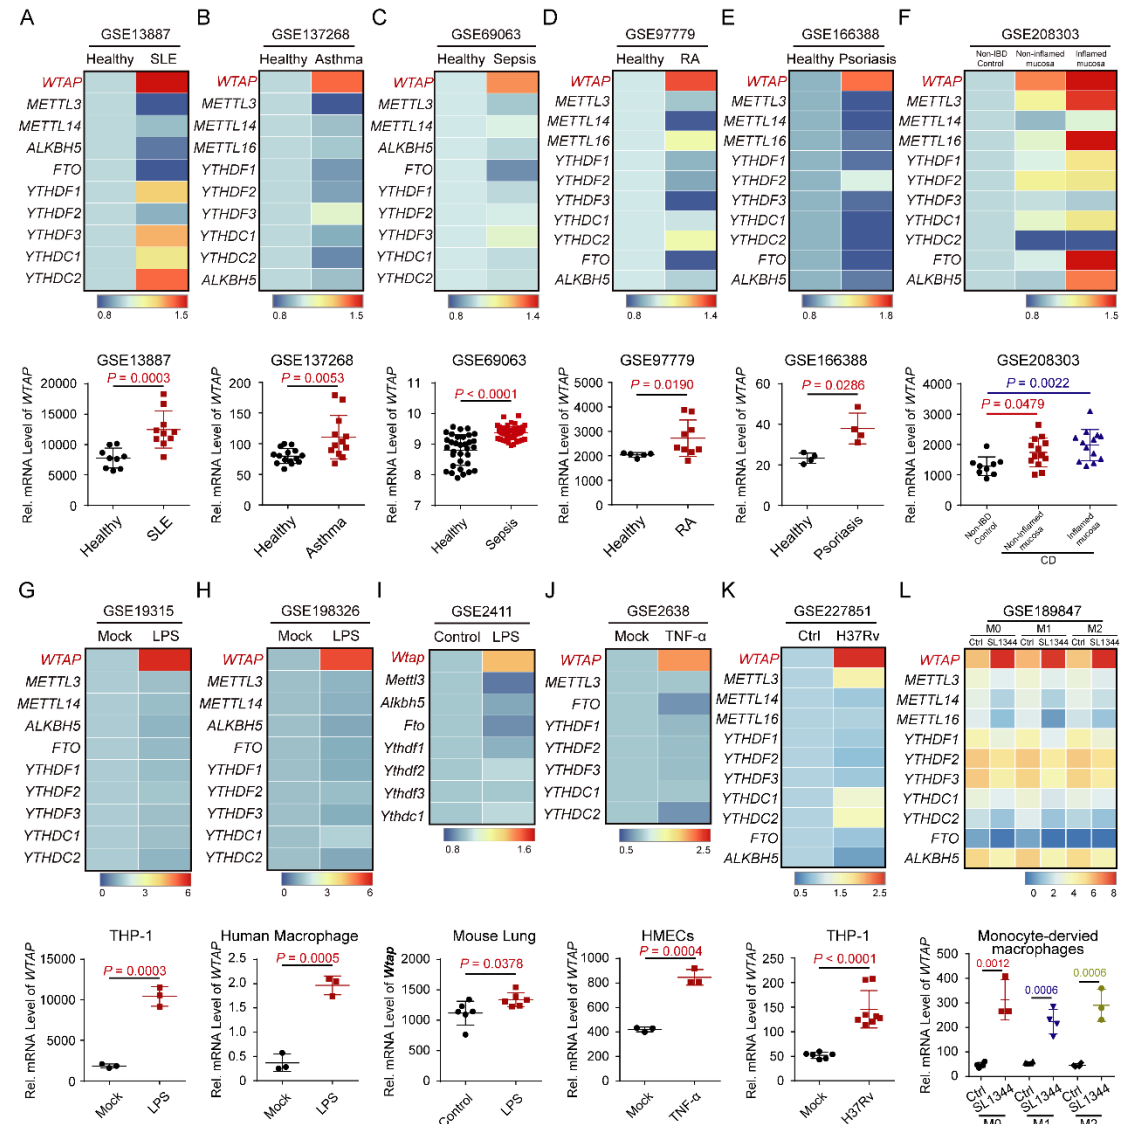

**Supplemental Figure 1. Hyperinflammation is accompanied by elevated WTAP level in many inflammatory diseases.** (A to F) Heatmap showing the mRNA abundance of m<sup>6</sup>A-related genes in patients with SLE (A), asthma (B), sepsis (C), RA (D), psoriasis (E) and IBD (F) compared with healthy controls. (G to L) Heatmap showing the mRNA abundance of m<sup>6</sup>A-related genes in THP-1 cells (G) and human macrophages (H) stimulated with LPS, in lung tissues of mice with LPS-induced lung injury (I), in TNF-α-stimulated HMECs (J), in *Mycobacterium tuberculosis*-infected THP-1 cells (K) or in *S. typhimurium*-infected macrophages (L). The relative mRNA expression of *WTAP* is shown below.

Data are presented as the mean ± s.d. in (A to I) with individual measurements overlaid as dots. Statistical analysis was performed using Mann–Whitney U test in (A to E), Kruskal–Wallis test in

(F) or two-tailed Student's  $t$ -test in (G to L).

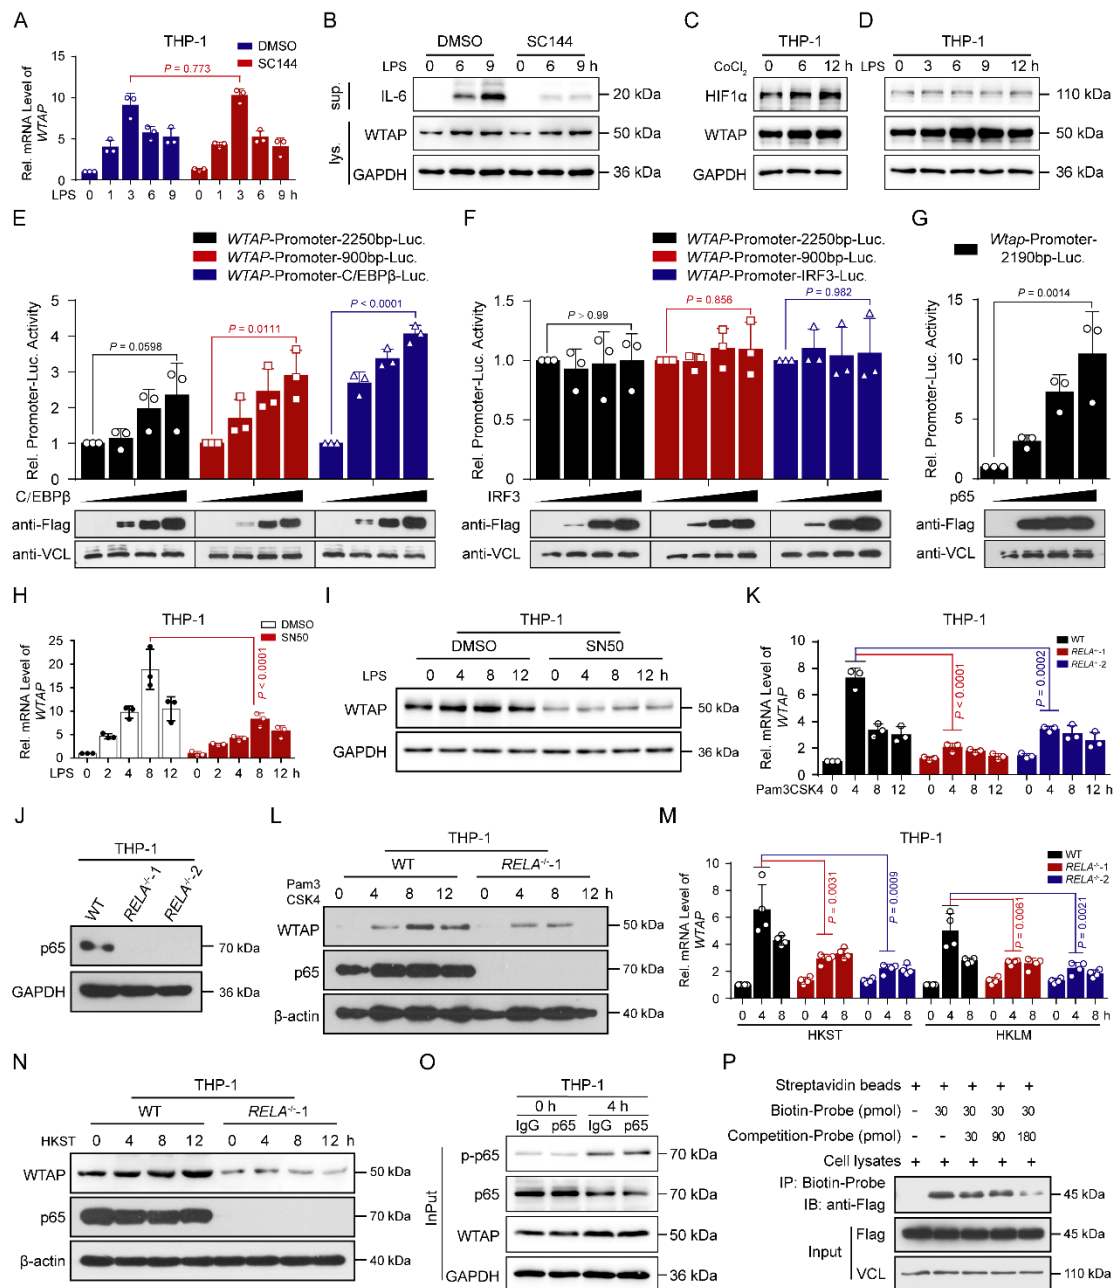

**Supplemental Figure 2. The upregulated WTAP in hyperinflammation is controlled by NF- $\kappa$ B p65.** (A and B) qRT-PCR (A) or immunoblots (B) showing the expression of WTAP in THP-1 cells pretreated with SC144, followed by stimulation with LPS at the indicated time points. (C) Immunoblots showing the expression of WTAP and HIF1 $\alpha$  in THP-1 cells treated with CoCl<sub>2</sub>. (D) Immunoblots showing the expression of WTAP and HIF1 $\alpha$  in THP-1 cells stimulated with LPS at different time points. (E and F) Luciferase activity analyses in 293T cells transfected with a luciferase reporter for the *WTAP* promoter, together with increasing doses of Flag-tagged C/EBP $\beta$  (E) or IRF3 (F). (G) Luciferase activity analyses in 293T cells transfected with a luciferase reporter for mouse *Wtap* promoter, together with increasing doses of Flag-tagged NF- $\kappa$ B p65. (H and I) qRT-

PCR or immunoblots showing the expression of WTAP in THP-1 cells pretreated with SN50, followed by stimulation with LPS at the indicated time points. **(J)** Immunoblots showing the efficiency of p65 knockout in THP-1 cells. **(K-N)** qRT-PCR (K and M) or immunoblots (L and N) showing the expression of WTAP in WT and *RELA*<sup>-/-</sup> THP-1 cells that were stimulated with Pam3CSK4, HKST or HKLM at the indicated time points. **(O)** Immunoblots showing the expression of WTAP and (p-) p65 in THP-1 cells stimulated with LPS at different time points. **(P)** DNA pull-down assays showing the effect of C/EBP $\beta$  binding with *WTAP* promoter probes.

Data are presented as the mean  $\pm$  s.d. in (A), (E to H), (K) and (M) with individual measurements overlaid as dots. Statistical analysis was performed using two-tailed Student's *t*-test in (A) and (E to H), or one-way ANOVA multiple comparisons in (K) and (M). Data are representative of three independent biological experiments in (B to G), (I), (J), (L) and (N-P).

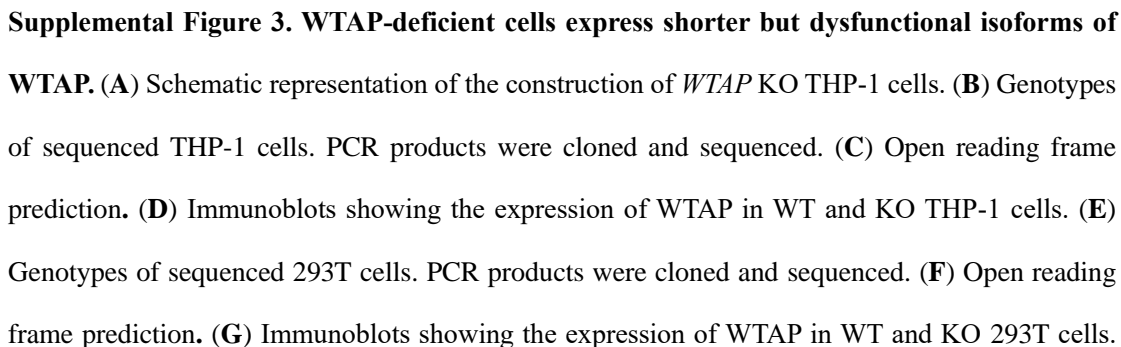

**Supplemental Figure 3. WTAP-deficient cells express shorter but dysfunctional isoforms of WTAP.** (A) Schematic representation of the construction of *WTAP* KO THP-1 cells. (B) Genotypes of sequenced THP-1 cells. PCR products were cloned and sequenced. (C) Open reading frame prediction. (D) Immunoblots showing the expression of WTAP in WT and KO THP-1 cells. (E) Genotypes of sequenced 293T cells. PCR products were cloned and sequenced. (F) Open reading frame prediction. (G) Immunoblots showing the expression of WTAP in WT and KO 293T cells.

(**H**) Schematic showing the *Wtap* conditional KO (cKO) strategy using the Cre-loxP system in mouse myeloid cells. (**I**) Genotypes of sequenced cells. PCR products were cloned and sequenced. (**J**) Open reading frame prediction. (**K**) Immunogen information for different brands of WTAP antibodies. (**L**) Immunoblots showing the expression of WTAP in WT and KO BMDMs. (**M** and **N**) Immunoblots showing the subcellular localization of wild-type and alternative WTAP proteins in WT, *WTAP* <sup>$\Delta$ 1-20</sup> and *WTAP* <sup>$\Delta$ 1-77</sup> THP-1 cells or in WT and *WTAP* <sup>$\Delta$ 1-20</sup> 293T cells. (**O**) LC–MS/MS detection the m<sup>6</sup>A abundance in mRNA extracted from *WTAP* <sup>$\Delta$ 1-20</sup> 293T cells transfected with PEGFP-N1, GFP-tagged WTAP, GFP-tagged *WTAP* <sup>$\Delta$ 1-20</sup> or GFP-tagged *WTAP* <sup>$\Delta$ 1-77</sup>. (**P**) LC–MS/MS detection the m<sup>6</sup>A abundance in mRNA extracted from WT, *WTAP* <sup>$\Delta$ 1-20</sup> and *WTAP* <sup>$\Delta$ 1-77</sup> THP-1 cells. (**Q**) LC–MS/MS detection the m<sup>6</sup>A abundance in mRNA extracted from WT and *Wtap* <sup>$\Delta$ 1-77</sup> BMDMs.

Data are representative of three independent biological experiments in (D), (G) and (L-N). Data are presented as the mean  $\pm$  s.d. in (O to Q), with individual measurements overlaid as dots. Statistical analysis was performed using one-way ANOVA multiple comparisons in (O) and (P), or two-tailed Student's *t*-test in (Q).

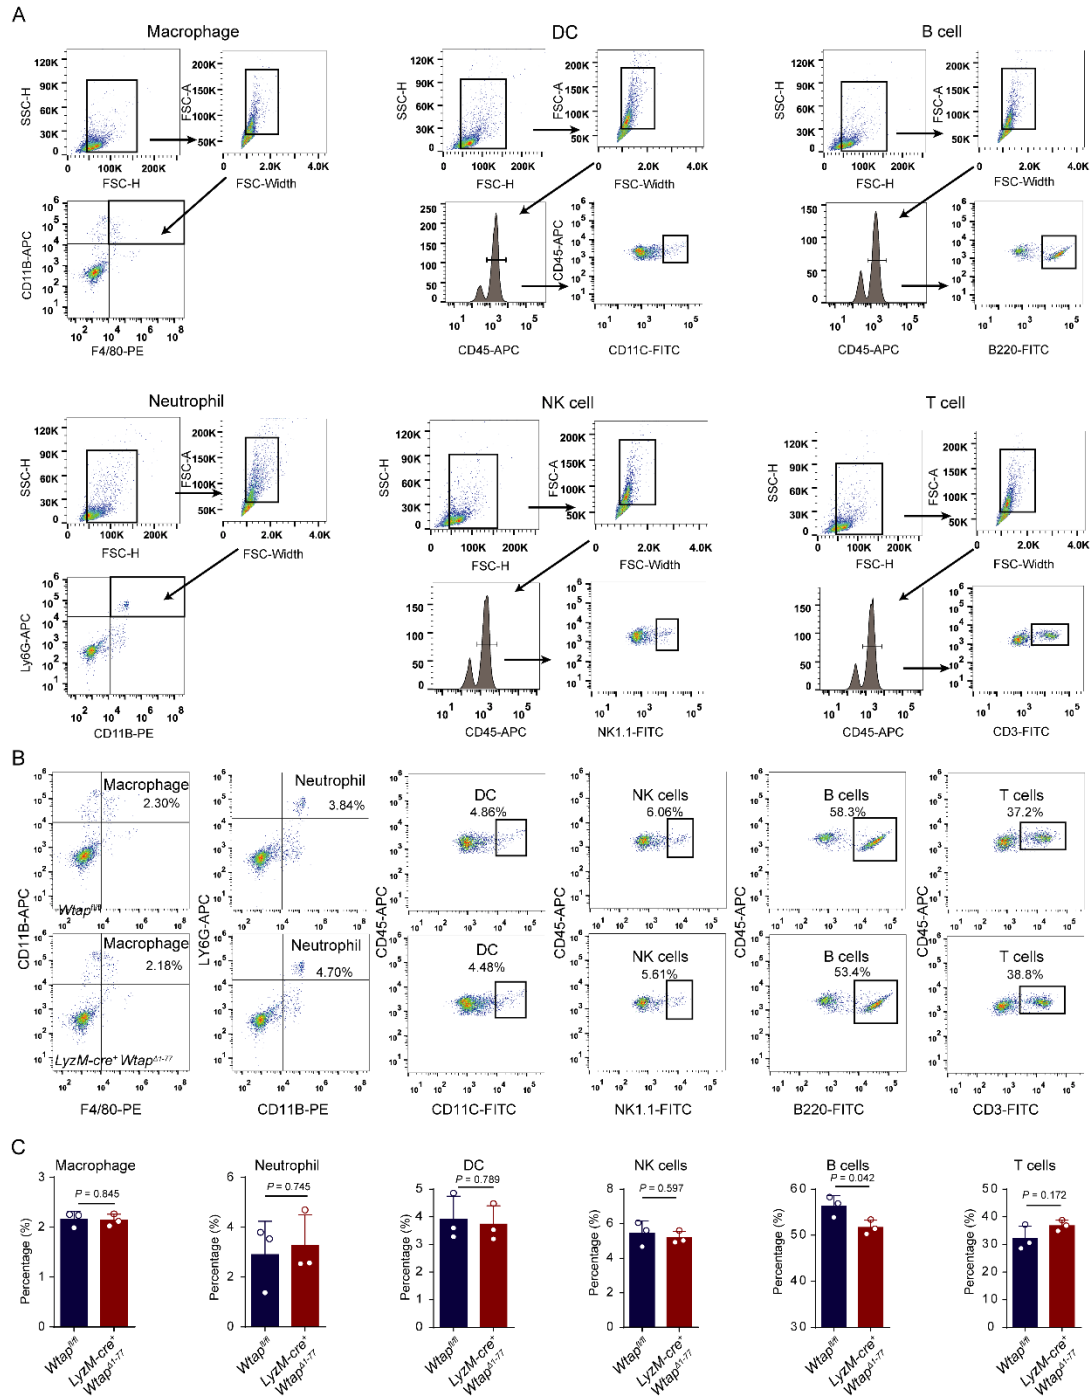

**Supplemental Figure 4. *Wtap* deficiency in myeloid cells did not affect the development or maturation of major immune cell populations. (A)** The gating strategy for sorting out various immune cells. **(B)** FACS analyses of major immune cell populations in spleens from *Wtap*<sup>fl/fl</sup> mice and *LyzM-Cre*<sup>+</sup> *Wtap*<sup>Δ1-77</sup> mice. n = 3 mice per group. **(C)** Percentage of macrophages, neutrophils, DC, NK, T and B cells from (B). n = 3 mice per group.

Data are representative of three independent biological experiments in (B). Data are presented as the mean ± s.d. in (C), with individual measurements overlaid as dots, statistical analysis was

performed using two-tailed Student's  $t$ -test.



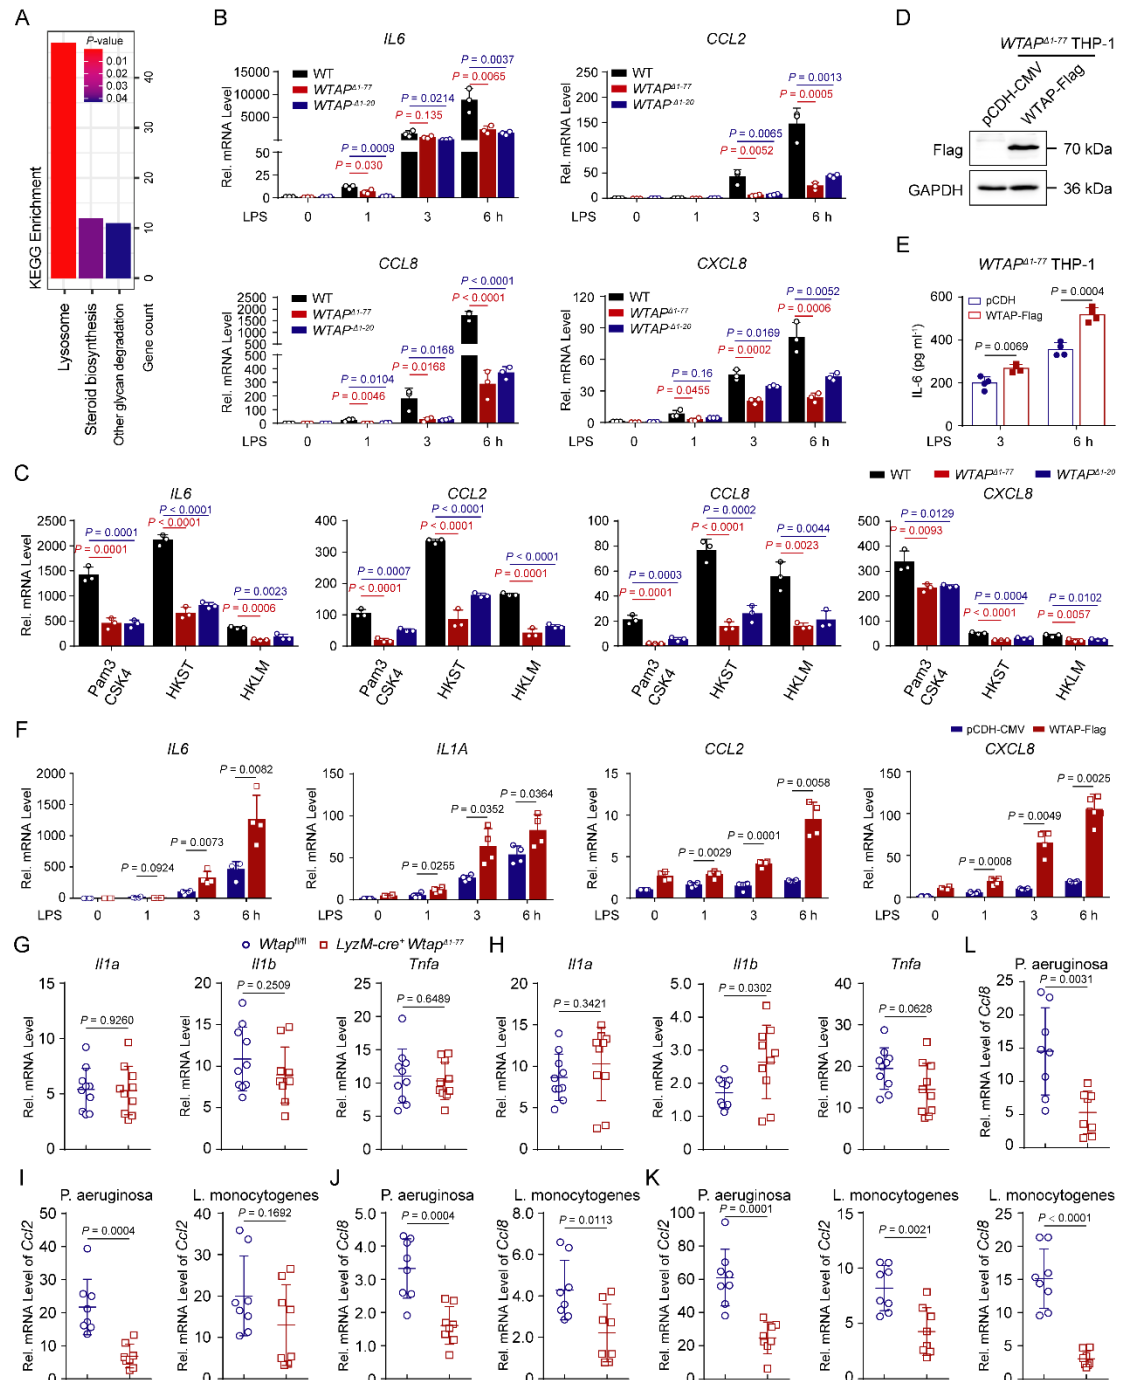

**Supplemental Figure 5. WTAP positively regulates proinflammatory responses.** (A) KEGG analyses of up-regulated DEGs in *WTAP*<sup>Δ1-77</sup> THP-1 cells stimulated with LPS compared with WT cells. (B) qRT-PCR showing the mRNA abundance of *IL6*, *CCL2*, *CCL8* and *CXCL8* in WT and *WTAP*<sup>Δ1-77</sup> THP-1 cells stimulated with LPS at the indicated time points. (C) qRT-PCR showing the mRNA abundance of *IL6*, *CCL2*, *CCL8* and *CXCL8* in WT and *WTAP*<sup>Δ1-77</sup> THP-1 cells that were stimulated with Pam3CSK4, HKST or HKLM at 6 hr. (D) Immunoblots showing the ectopic expression of Flag-tagged WTAP in *WTAP*<sup>Δ1-77</sup> THP-1 cells. (E) ELISAs were performed to detect

IL-6 secretion in supernatants of *WTAP<sup>Δ1-77</sup>* THP-1 cells transfected with empty vector or Flag-tagged WTAP, followed by stimulation with LPS at 3 and 6 hr. **(F)** qRT-PCR showing the mRNA abundance of *IL6*, *IL1A*, *CCL2* and *CXCL8* in *WTAP<sup>Δ1-77</sup>* THP-1 cells transfected with Flag-tagged WTAP, followed by stimulation with LPS at different time points. **(G and H)** qRT-PCR showing the mRNA abundance of *Il1a*, *Il1b* and *Tnfa* in the lung (G) or colon (H) tissues from *Wtap<sup>fl/fl</sup>* and *LyzM-cre<sup>+</sup> Wtap<sup>Δ1-77</sup>* mice that were intraperitoneally injected with LPS (10 mg kg<sup>-1</sup>) for 12 hr. n = 10 mice per group. **(I to L)** qRT-PCR showing the mRNA abundance of *Ccl2* and *Ccl8* in the colon tissues from *Wtap<sup>fl/fl</sup>* and *LyzM-cre<sup>+</sup> Wtap<sup>Δ1-77</sup>* mice that were intraperitoneally injected with *P. aeruginosa* (I and J) or *L. monocytogenes* (K and L) for 16 hr. n = 8 mice per group.

Data are presented as the mean ± s.d. in (B), (C) and (E to L), with individual measurements overlaid as dots. Statistical analysis was performed using one-way ANOVA multiple comparisons in (B) and (C), or two-tailed Student's *t*-test in (E to L). Data are representative of three independent biological experiments in (D).

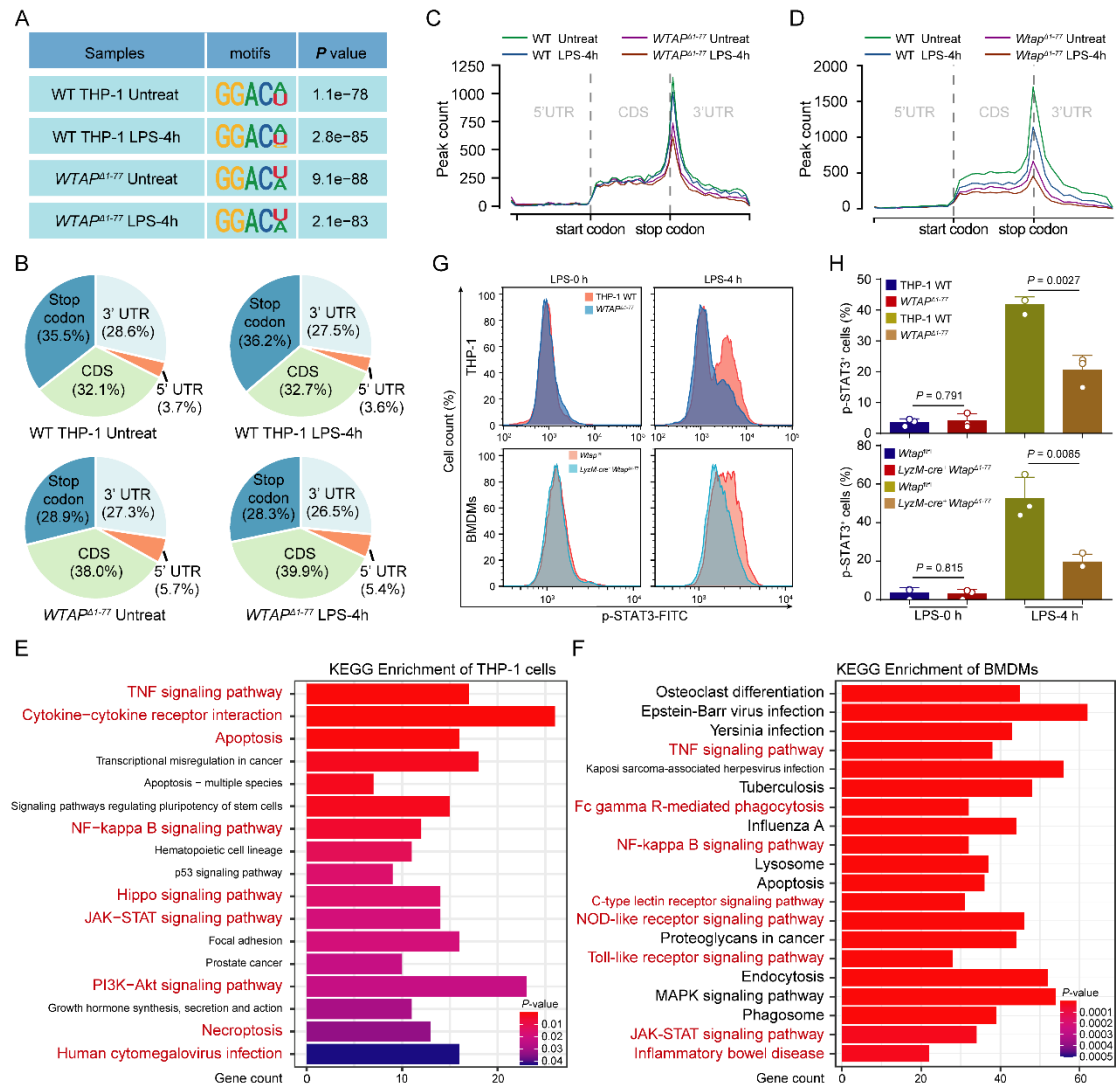

**Supplemental Figure 6. WTAP deficiency significantly reduces the abundance of m<sup>6</sup>A modification of inflammatory genes.** (A) Sequence motif was identified within m<sup>6</sup>A peaks by HOMER analyses of WT and WTAP<sup>Δ1-77</sup> THP-1 cells with or without LPS treatment. (B) Pie charts depicting the proportion of m<sup>6</sup>A peak distribution in the 5' UTR, CDS, and 3' UTR regions across mRNA transcriptome. (C and D) Metagene profiles of m<sup>6</sup>A peak distribution across the 5' UTR, CDS, and 3' UTR in WT and WTAP<sup>Δ1-77</sup> THP-1 cells (C) or Wtap<sup>Δ1-77</sup> BMDMs (D) with or without LPS treatment. (E and F) KEGG enrichment analysis of the transcripts with decreased m<sup>6</sup>A marks in WTAP<sup>Δ1-77</sup> THP-1 cells (E) or Wtap<sup>Δ1-77</sup> BMDMs (F) after treatment with LPS. (G and H) Representative flow cytometry data showing p-STAT3 fluorescence intensity in WT and WTAP<sup>Δ1-77</sup> THP-1 cells or BMDMs before and after LPS stimulation.

Data are presented as the mean  $\pm$  s.d. in (H), with individual measurements overlaid as dots, statistical analysis was performed using two-tailed Student's *t*-test. Data are representative of three

independent biological experiments in (G).

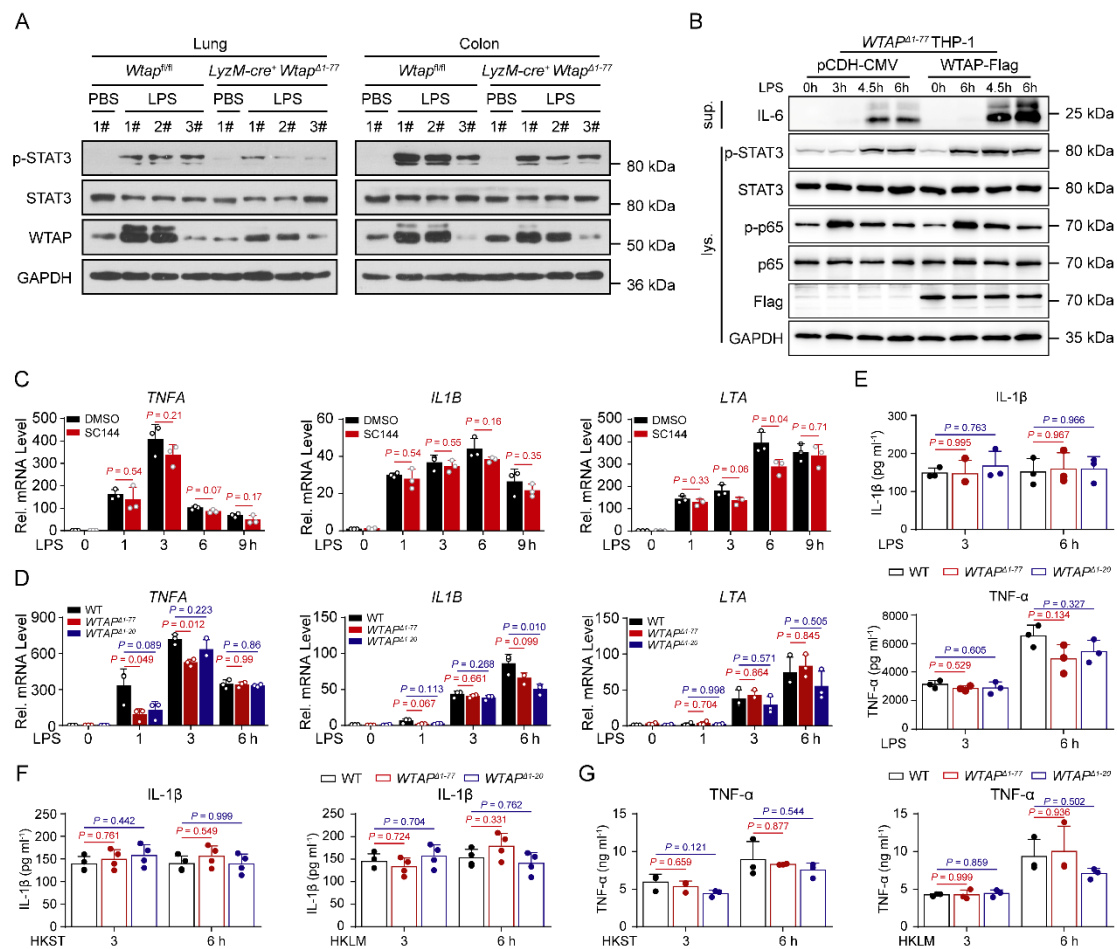

**Supplemental Figure 7. WTAP deficiency does not affect the expression of IL-1 $\beta$  and TNF- $\alpha$ .**

(A) Immunoblots showing the total and phosphorylated STAT3 level in the lung or colon tissues from *Wtap<sup>fl/fl</sup>* and *LyzM-cre<sup>+</sup> Wtap<sup>Δ1-77</sup>* mice that had been intraperitoneally injected with LPS for 6 hr. (B) Immunoblots showing total and phosphorylated STAT3 and p65 levels in *WTAP<sup>Δ1-77</sup>* THP-1 cells transfected with Flag-tagged WTAP, followed by stimulation with LPS at different time points. (C) qRT-PCR showing the expression of *TNFA*, *IL1B* and *LTA* in THP-1 cells treated with SC144, followed by stimulation with LPS at the indicated time points. (D) qRT-PCR showing the expression of *TNFA*, *IL1B* and *LTA* in WT and *WTAP<sup>Δ1-77</sup>* THP-1 cells that were stimulated with LPS at 3 and 6 hr. (E-G) ELISAs were performed to measure IL-1 $\beta$  and TNF- $\alpha$  secretion in supernatants of WT and *WTAP<sup>Δ1-77</sup>* THP-1 cells that were stimulated with LPS (E), HKST (F) or HKLM (G) at 3 and 6 hr.

Data are presented as the mean  $\pm$  s.d. in (C to G), with individual measurements overlaid as dots, statistical analysis was performed using two-tailed Student's *t*-test in (C), or one-way ANOVA

multiple comparisons in (D to G). Data are representative of three independent biological experiments in (A) and (B).

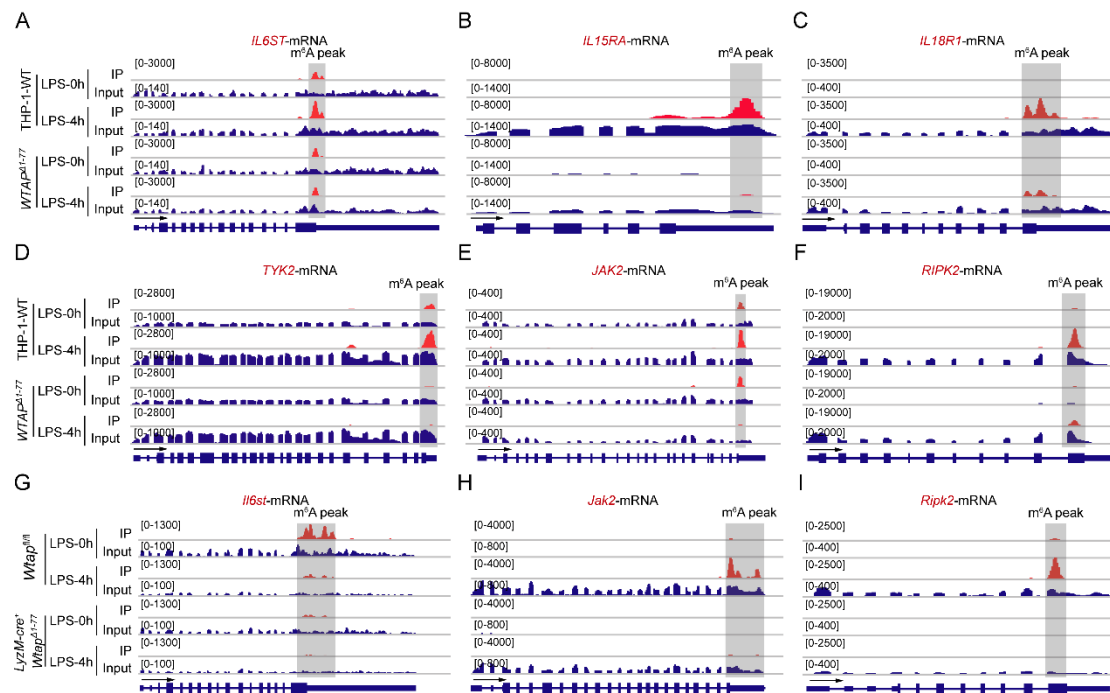

**Supplemental Figure 8. WTAP deficiency decreases the m<sup>6</sup>A modification of many inflammatory genes.** (A to F) Integrative Genomics Viewer (IGV) browser tracks showing that m<sup>6</sup>A peaks were enriched in the 3' UTR or CDS regions of *IL6ST* (A), *IL15RA* (B), *IL18R1* (C), *TYK2* (D), *JAK2* (E) and *RIPK2* (F) transcripts. (G to I) IGV browser tracks showing that m<sup>6</sup>A peaks were enriched in the 3' UTR or CDS regions of *Il6st* (G), *Jak2* (H), and *Ripk2* (I) transcripts.

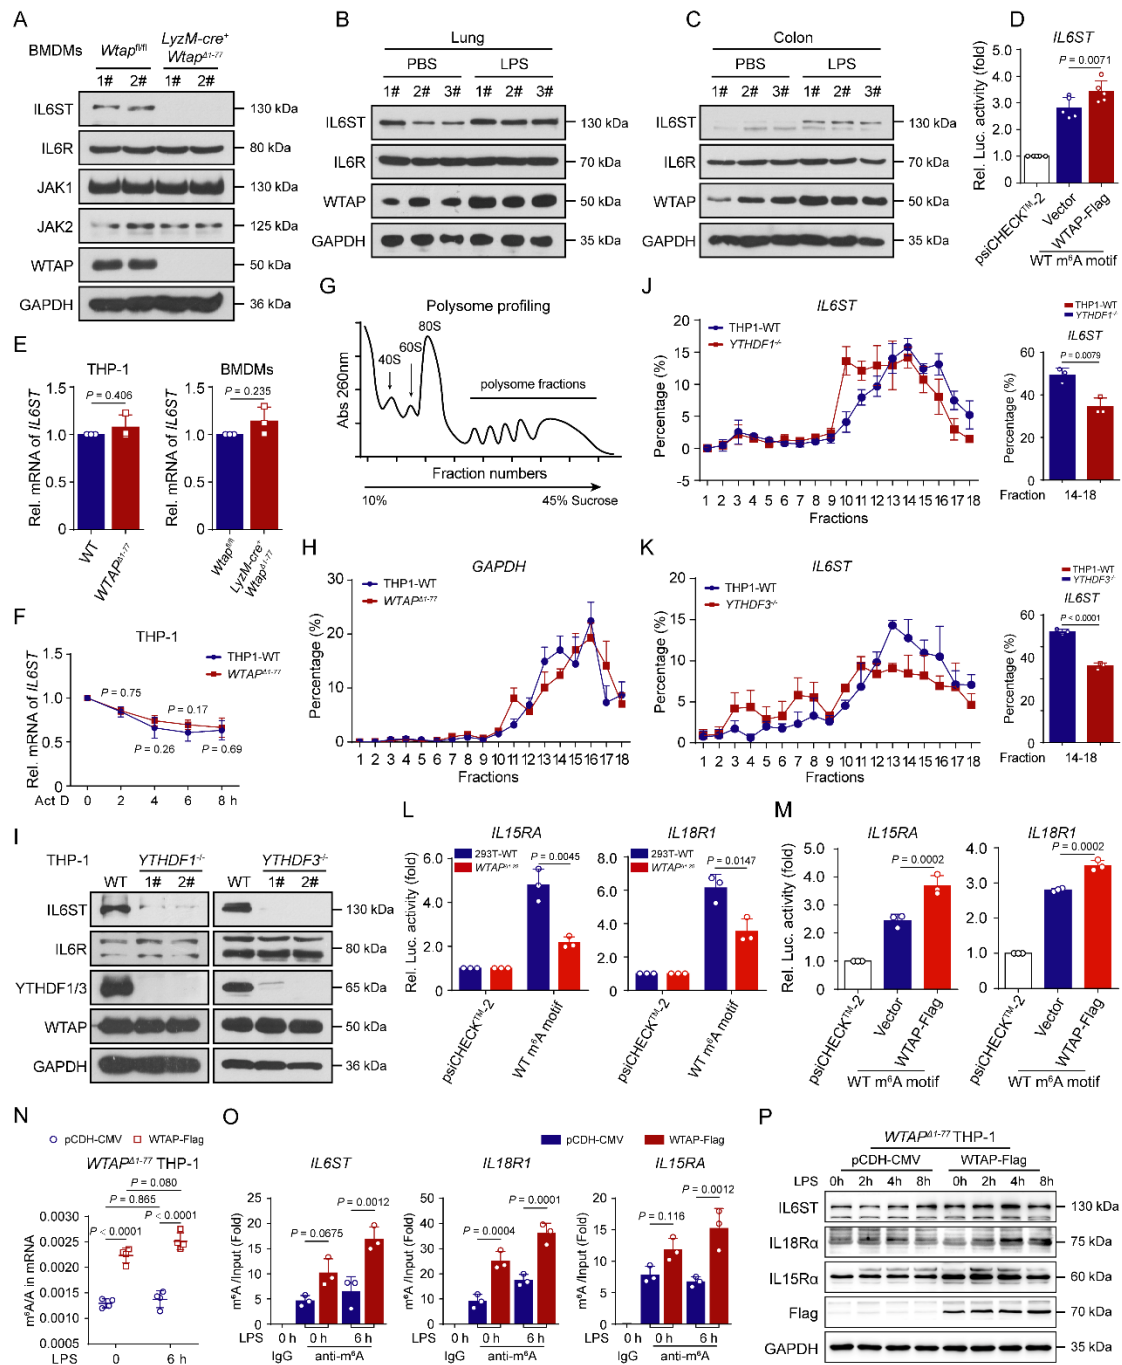

**Supplemental Figure 9. WTAP promotes the protein expression of proinflammatory genes through m<sup>6</sup>A modification.** (A) Immunoblots showing the expression of critical adaptors in the IL-6/STAT3 signaling pathway in BMDMs from *Wtap*<sup>fl/fl</sup> or *LyzM-Cre*<sup>+</sup> *Wtap*<sup>Δ1-77</sup> mice. (B and C) Immunoblots showing the expression of WTAP and IL6ST in the lung (B) or colon (C) tissues from wild-type mice that had been intraperitoneally injected with LPS or PBS for 12 hr. (D) Relative luciferase activities of reporter vectors bearing *IL6ST*-3' UTR with wild-type m<sup>6</sup>A sites after co-transfection with empty vector (EV) or Flag-tagged WTAP into *WTAP* KO 293T cells. (E) qRT-PCR showing the mRNA abundance of *IL6ST* in WT and *WTAP*<sup>Δ1-77</sup> THP-1 cells or BMDMs. (F)



qRT-PCR showing the mRNA abundance of *IL6ST* in WT and *WTAP* <sup>$\Delta$ 1-77</sup> THP-1 cells treated with Act D at the indicated time points. (G) Schematic representation of the polysome profiling. (H) qRT-PCR showing the proportion of *GAPDH* mRNA in polysome fractions from WT and *WTAP*<sup>-/-</sup> THP-1 cells treated with LPS for 6 hr. (I) Immunoblots showing the expression of IL6ST in WT and *YTHDF1*<sup>-/-</sup> or *YTHDF3*<sup>-/-</sup> THP-1 cells. (J and K) qRT-PCR showing the proportion of *IL6ST* mRNA in polysome fractions from WT and *YTHDF1*<sup>-/-</sup> (J) or *YTHDF3*<sup>-/-</sup> (K) THP-1 cells. Relative enrichment of IL6ST mRNA in polysome part (fraction 14–18) was showed in left. (L) Relative luciferase activities in WT and *WTAP* KO 293T cells after transfection with reporter vectors bearing the *IL15RA*- or *IL18R1*-3' UTR with WT m<sup>6</sup>A sites. (M) Relative luciferase activities of reporter vectors bearing *IL15RA*- or *IL18R1*-3' UTR with wild-type m<sup>6</sup>A sites after co-transfection with empty vector (EV) or Flag-tagged WTAP into *WTAP* KO 293T cells. (N) LC-MS/MS quantification of m<sup>6</sup>A abundance in mRNA extracted from *WTAP* <sup>$\Delta$ 1-77</sup> THP-1 cells transfected with empty vector or Flag-tagged WTAP, followed by stimulation with LPS. (O) The abundance of *IL6ST*, *IL15RA* or *IL18R1* transcripts among mRNAs immunoprecipitated with an anti-m<sup>6</sup>A antibody in *WTAP* <sup>$\Delta$ 1-77</sup> THP-1 cells transfected with empty vector or Flag-tagged WTAP, followed by stimulation with LPS. (P) Immunoblots analyses showing the protein abundance of IL6ST, IL18R $\alpha$  and IL15R $\alpha$  in *WTAP* <sup>$\Delta$ 1-77</sup> THP-1 cells transfected with empty vector or Flag-tagged WTAP, followed by stimulation with LPS at different time points.

Data are representative of three independent biological experiments in (A to C), (I) and (P). Data are presented as the mean  $\pm$  s.d. in (D to F), (H) and (J to O), with individual measurements overlaid as dots. Statistical analysis was performed using one-way ANOVA multiple comparisons in (D) and (M to O), or two-tailed Student's *t*-test in (E), (F), and (J to L).

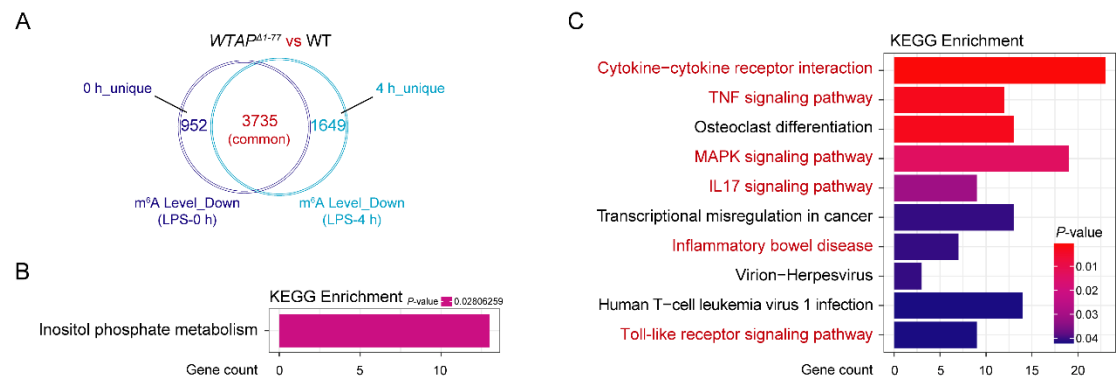

**Supplemental Figure 10. WTAP is deeply involved in the regulation of inflammatory response.**

(A) Venn diagrams showing transcripts with decreased m<sup>6</sup>A abundance in WTAP<sup>Δ1-77</sup> THP-1 cells compared with WT cells stimulated with or without LPS. (B) KEGG enrichment analysis of the 952 transcripts with decreased m<sup>6</sup>A abundance only at resting state. (C) KEGG enrichment analysis of the 1649 transcripts with decreased m<sup>6</sup>A abundance only after treatment with LPS for 4 hr.

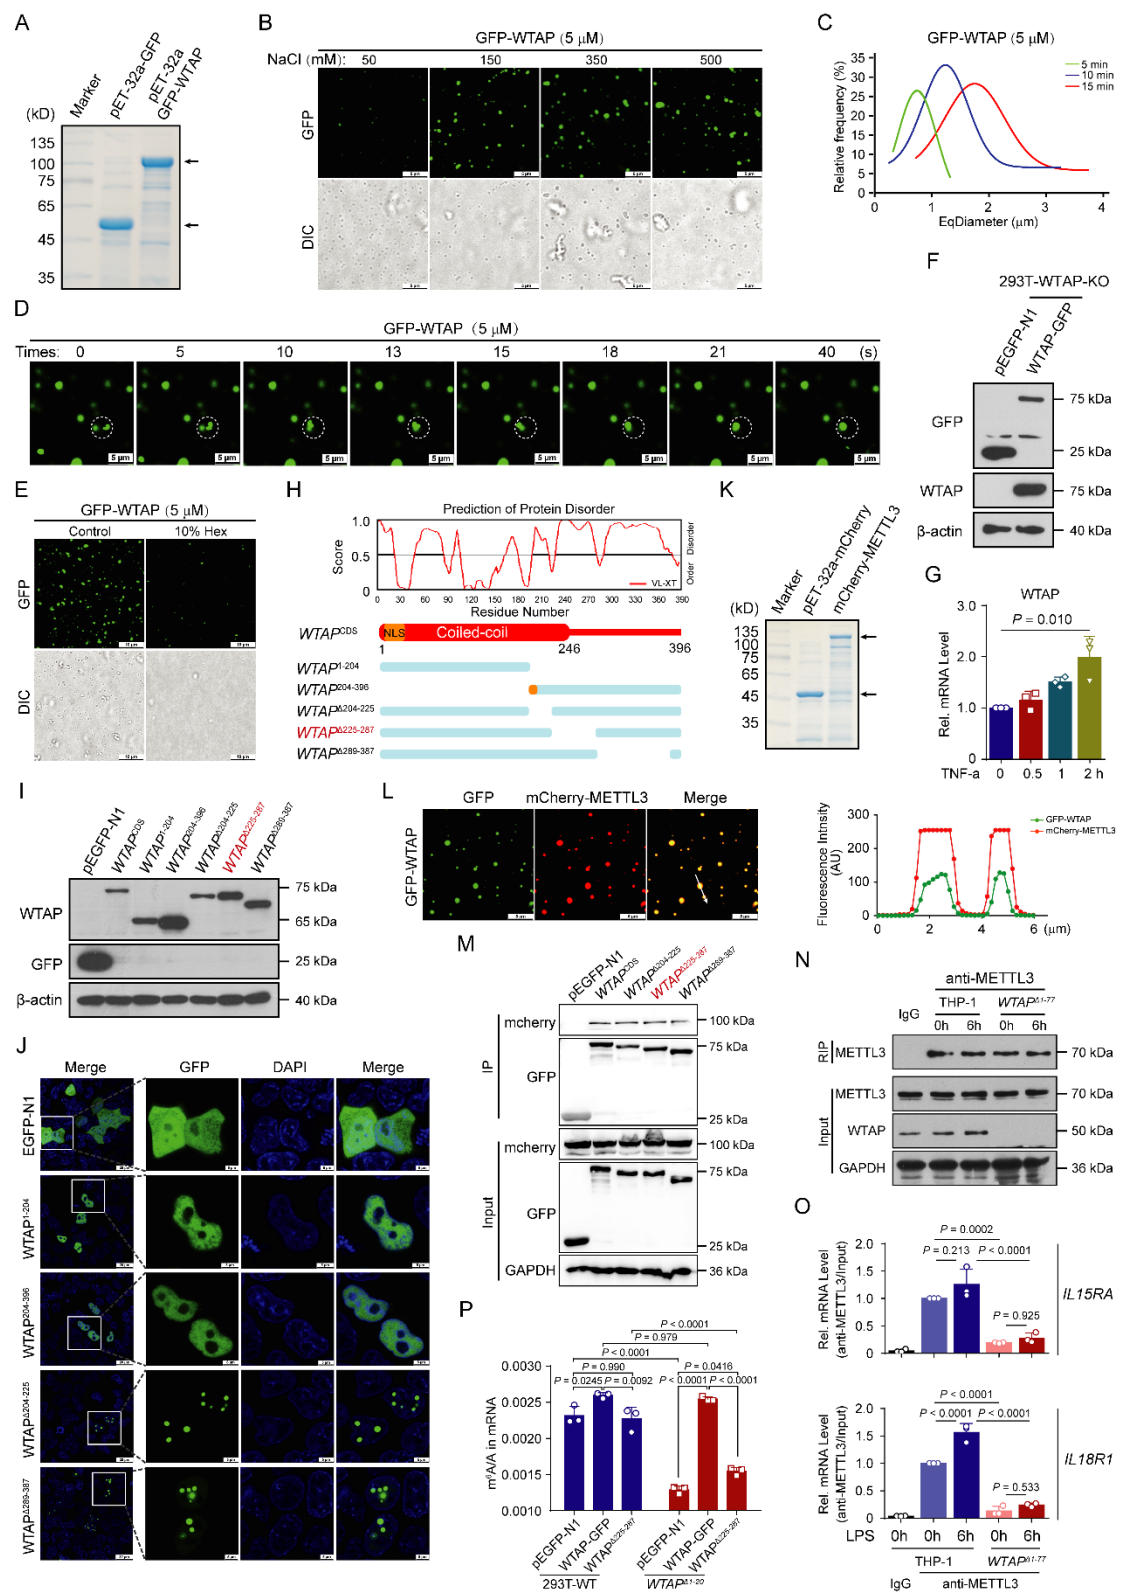

**Supplemental Figure 11. Phase separation of WTAP leads to METTL3 recruitment to efficiently modify inflammatory transcripts.** (A) Bacterial purified GFP-WTAP proteins were analyzed by SDS-PAGE and detected by coomassie blue staining. (B) Images of GFP-WTAP droplets formation at room temperature with indicated NaCl concentrations (5  $\mu$ M GFP-WTAP).

(C) EqDiameter (the diameter of a circle with the same area as the measured object) frequency distribution of GFP-WTAP liquid droplets formed at the indicated timepoints (350 mM NaCl, 5  $\mu$ M GFP-WTAP). (D) Time-lapse micrographs of the fusion at room temperature of GFP-WTAP (5  $\mu$ M) liquid droplets formed at the indicated times. (E) GFP-WTAP were treated with 5% Hex and then subjected to droplet formation assay *in vitro* (350 mM NaCl, 5  $\mu$ M GFP-WTAP). (F) Immunoblots showing of the expression of GFP-tagged WTAP. (G) qRT-PCR showing the mRNA abundance of *WTAP* in HeLa cells stimulated with TNF- $\alpha$  at the indicated time points. (H) Prediction of the unfolded intrinsically disordered regions (IDRs) of WTAP using the PONDR tool, and a series of truncated WTAP labeled with GFP are as shown. (I and J) Immunoblots (I) and representative confocal images (J) of 293T expressing truncated WTAP labeled with GFP. (K) Bacterial purified mCherry-METTL3 proteins were analyzed by SDS-PAGE and detected by coomassie blue staining. (L) Fluorescence of mCherry-METTL3 (10  $\mu$ M) and GFP-WTAP (10  $\mu$ M) mixed at room temperature with 350 mM NaCl. Quantitative line profile of colocalization along a white arrow of the image on the left. (M) Coimmunoprecipitation and immunoblot analyses of extracts of 293T cells transfected with various combinations of plasmids encoding GFP-tagged WTAP and mCherry-tagged METTL3. (N and O) METTL3 was immunoprecipitated (N) and RIP-qPCR was performed to assess the association of *IL15RA* or *IL18R1* transcripts with METTL3 (O). (P) LC-MS/MS quantification of m<sup>6</sup>A abundance in mRNA extracted from WT and *WTAP* <sup>$\Delta$ 1-20</sup> 293T cells transfected with indicated plasmids.

Data are representative of three independent biological experiments in (A to F), (I to N) and (P). Data are presented as the mean  $\pm$  s.d. in (G), (O) and (P), with individual measurements overlaid as dots. Statistical analysis was performed using two-tailed Student's *t*-test in (G), or one-way ANOVA multiple comparisons in (O) and (P). Indicated scale bars are shown in (B), (D), (E), (J) and (L).

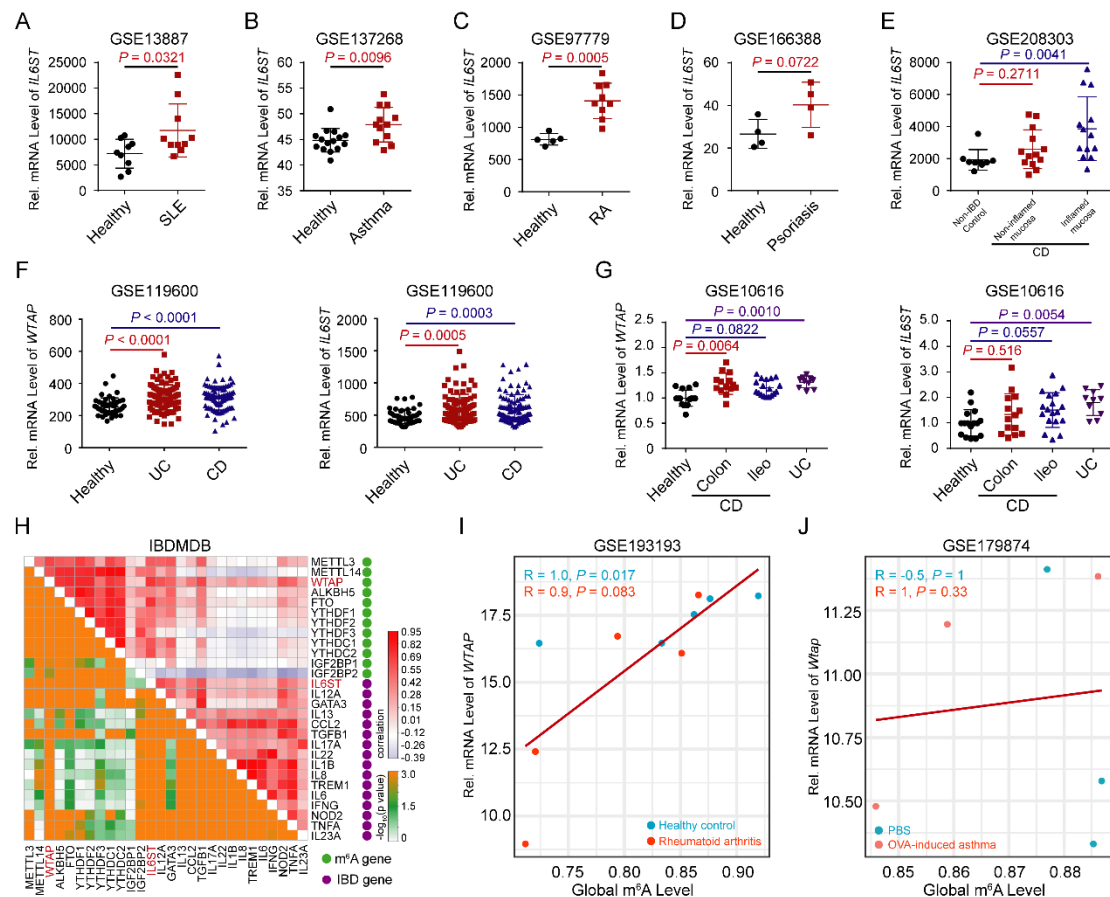

**Supplemental Figure 12. The expression of WTAP and IL6ST is increased in patients with inflammatory diseases.** (A-E) The mRNA abundance of *IL6ST* in patients with SLE, asthma, RA, psoriasis and IBD compared with those in healthy controls. (F and G) The mRNA abundance of *WTAP* and *IL6ST* in patients with IBD compared with healthy controls. (H) Spearman correlations between m<sup>6</sup>A regulators and IBD core cytokines in IBDMDB patients. (I and J) Spearman correlations between the expression of WTAP and the global m<sup>6</sup>A abundance in RA patients (I), or in ovalbumin (OVA)-induced acute allergic asthma mice (J).

Data are presented as the mean  $\pm$  s.d. in (A to C), with individual measurements overlaid as dots. Statistical analysis was performed using Mann–Whitney U test in (A to D), or Kruskal–Wallis test in (E to G).

## Supplemental tables

**Supplementary Table 1. The brief descriptions of the inclusive data series Source**

|           | Subjects analysed (sample size) |                                    |                                                           |                                         |                                                       | Type of sample              | Type of data |
|-----------|---------------------------------|------------------------------------|-----------------------------------------------------------|-----------------------------------------|-------------------------------------------------------|-----------------------------|--------------|
| GSE19315  | Untreated (3)                   |                                    | LPS-treated (3)                                           |                                         |                                                       | THP-1 cells                 | mRNA         |
| GSE198326 | DMSO-treated (3)                |                                    | LPS-treated (3)                                           |                                         |                                                       | Macrophages of healthy male | mRNA         |
| GSE2411   | Untreated (6)                   |                                    | LPS-treated (6)                                           |                                         |                                                       | Mouse lung homogenate       | mRNA         |
| GSE2638   | Untreated (3)                   |                                    | TNF-treated (3)                                           |                                         |                                                       | HMEC                        | mRNA         |
| GSE69063  | Healthy controls (33)           |                                    | Sepsis patients (57)                                      |                                         |                                                       | Peripheral blood samples    | mRNA         |
| GSE13887  | Healthy controls (9)            |                                    | SLE patients (10)                                         |                                         |                                                       | T cells                     | mRNA         |
| GSE137268 | Healthy controls (15)           |                                    | Severe asthma patients (12)                               |                                         |                                                       | Sputum                      | mRNA         |
| GSE97779  | Healthy controls (5)            |                                    | Rheumatoid arthritis patients (9)                         |                                         |                                                       | Synovial macrophages        | mRNA         |
| GSE166388 | Healthy controls (4)            |                                    | Psoriasis patients (4)                                    |                                         |                                                       | Skin epidermis              | mRNA         |
| GSE208303 | Healthy mucosa of non-IBD (9)   |                                    | Non-inflamed mucosa in patients with Crohn's disease (13) |                                         | Inflamed mucosa in patients with Crohn's disease (13) | Intestinal mucosa           | mRNA         |
| GSE16879  | Normal mucosa from              | Ileal mucosal from Crohn's ileitis | Ileal mucosal from Crohn's ileitis                        | Ileal mucosal from Crohn's ileitis non- | Ileal mucosal from Crohn's ileitis non-               | Ileal mucosa                | mRNA         |



|           |                      |                            |                      |                            |                      |                            |                                                    |      |
|-----------|----------------------|----------------------------|----------------------|----------------------------|----------------------|----------------------------|----------------------------------------------------|------|
| GSE227851 | Uninfected (6)       |                            | H37Rv-infected (8)   |                            |                      |                            | Monocyte differentiated to<br>macrophages with PMA | mRNA |
| GSE189847 | Uninfected<br>M0 (4) | SL1344-<br>infected M0 (3) | Uninfected M1<br>(4) | SL1344-<br>infected M1 (4) | Uninfected M2<br>(4) | SL1344-<br>infected M2 (3) | Monocyte-derived<br>macrophages                    | mRNA |



**Supplementary Table 2. Predicted transcription factors that binding to *WTAP* promoter**

| Name          | Score     | Relative score | Start | End  | Strand | Predicted sequence    |
|---------------|-----------|----------------|-------|------|--------|-----------------------|
| C/EBP $\beta$ | 15.449436 | 0.981882518    | 1848  | 1858 | +      | gattgcaccac           |
| C/EBP $\beta$ | 14.261012 | 0.969425289    | 1713  | 1723 | -      | gatttcaccat           |
| IRF3          | 9.186087  | 0.817418043    | 1384  | 1404 | +      | aaagaaaggaaagggaaggaa |
| p65           | 8.949939  | 0.834631296    | 1717  | 1726 | -      | tgggatttca            |
| STAT3         | 8.424692  | 0.89961612     | 506   | 516  | +      | cttctaaaat            |
| p65           | 8.096203  | 0.812290467    | 86    | 95   | -      | ggggttttct            |
| p65           | 8.085627  | 0.812013705    | 68    | 77   | -      | tggactttca            |
| IRF3          | 7.820719  | 0.806317005    | 1972  | 1992 | -      | gttgaaagcaaattgaaacaa |
| STAT3         | 7.029458  | 0.882713481    | 1631  | 1641 | -      | attacaggaat           |
| STAT3         | 6.6519017 | 0.878139555    | 1631  | 1641 | +      | attcctgtaat           |
| C/EBP $\beta$ | 6.5461287 | 0.888556797    | 210   | 220  | +      | tgttgccaag            |
| HIF1 $\alpha$ | 5.4975653 | 0.82156562     | 1135  | 1144 | +      | gcacatgcct            |
| STAT3         | 5.4137197 | 0.863139531    | 1263  | 1273 | -      | ttttgagaac            |
| STAT3         | 5.282355  | 0.861548105    | 679   | 689  | -      | atgcctgtaat           |
| STAT3         | 5.282355  | 0.861548105    | 1768  | 1778 | +      | atgcctgtaat           |
| HIF1 $\alpha$ | 5.2455807 | 0.815632422    | 552   | 561  | -      | agacgttcat            |
| STAT3         | 5.1454854 | 0.859889993    | 496   | 506  | -      | gttcagaaaaa           |
| HIF1 $\alpha$ | 5.028608  | 0.810523608    | 1133  | 1142 | -      | gcatgtgcca            |
| STAT3         | 4.954211  | 0.857572791    | 578   | 588  | +      | tttttaaaaa            |
| C/EBP $\beta$ | 15.449436 | 0.981882518    | 1848  | 1858 | +      | gattgcaccac           |
| C/EBP $\beta$ | 14.261012 | 0.969425289    | 1713  | 1723 | -      | gatttcaccat           |

The predicted results were analyzed by the JASPAR (<http://jaspar.genereg.net/>).

**Supplementary Table 3. List of oligonucleotides used in this study**

|                                                                   |
|-------------------------------------------------------------------|
| <i>WTAP</i> sgRNA sequence (5'-3')-1: CACCGCTTGGGAAGAGGTTCTTCGT   |
| <i>WTAP</i> sgRNA sequence (5'-3')-2: CACCGCAAGAGATGAGTTAATTCTA   |
| <i>IL6ST</i> sgRNA sequence (5'-3')-1: CACCGTGCAACGTCAACATCTTGCG  |
| <i>IL6ST</i> sgRNA sequence (5'-3')-2: CACCGAGATGTTGACGTTGCAGACT  |
| <i>YTHDF1</i> sgRNA sequence (5'-3')-1: CACCGAAATGGTTCGTTACATCAGA |
| <i>YTHDF1</i> sgRNA sequence (5'-3')-2: CACCGAGACCCAGAGCTCCGCGTAT |
| <i>YTHDF3</i> sgRNA sequence (5'-3')-1: CACCGTTTGTCTGGCTACTTAAGTA |
| <i>YTHDF3</i> sgRNA sequence (5'-3')-2: CACCGTGGACTATAATGCGTATGC  |
| Human <i>GAPDH</i> Forward 5'-TGTTGCCATCAATGACCCCTT-3'            |
| Human <i>GAPDH</i> Reverse 5'-CTCCACGACGTACTCAGCG-3               |
| Mouse <i>Gapdh</i> Forward 5'-TGACCTCAACTACATGGTCTACA-3'          |
| Mouse <i>Gapdh</i> Reverse 5'-CTTCCCATTCTCGGCCTTG-3'              |
| Human <i>ACTB</i> Forward 5'-CATGTACGTTGCTATCCAGGC-3'             |
| Human <i>ACTB</i> Reverse 5'-CTCCTTAATGTCACGCACGAT-3'             |
| Mouse <i>Actb</i> Forward 5'-GTGACGTTGACATCCGTAAAGA-3'            |
| Mouse <i>Actb</i> Reverse 5'-GCCGGACTCATCGTACTCC-3'               |
| Human <i>WTAP</i> Forward 5'-ACTGGCCTAAGAGAGTCTGAAG-3'            |
| Human <i>WTAP</i> Reverse 5'-GTTGCTAGTCGCATTACAAGGA-3'            |
| Mouse <i>Wtap</i> Forward 5'-GAACCTCTTCCTAAAAAGGTCCG-3'           |
| Mouse <i>Wtap</i> Reverse 5'-TTAACTCATCCCGTGCCATAAC-3'            |
| Human <i>METTL3</i> Forward 5'-TTGTCTCCAACCTTCCGTAGT-3'           |
| Human <i>METTL3</i> Reverse 5'-CCAGATCAGAGAGGTGGTGTAG-3'          |
| Mouse <i>Mettl3</i> Forward 5'-CTGGGCACTTGGATTAAAGGAA-3'          |
| Mouse <i>Mettl3</i> Reverse 5'-TGAGAGGTGGTGTAGCAACTT-3'           |
| Human <i>METTL14</i> Forward 5'-AGTGCCGACAGCATTGGTG-3'            |
| Human <i>METTL14</i> Reverse 5'-GGAGCAGAGGTATCATAGGAAGC-3'        |
| Mouse <i>Mettl14</i> Forward 5'-CTGAGAGTGCGGATAGCATTG-3'          |
| Mouse <i>Mettl14</i> Reverse 5'-GAGCAGATGTATCATAGGAAGCC-3'        |

|                                                                             |
|-----------------------------------------------------------------------------|
| Human <i>IL1B</i> Forward 5'-ATGATGGCTTATTACAGTGGCAA-3'                     |
| Human <i>IL1B</i> Reverse 5'-GTCGGAGATTCGTAGCTGGA-3'                        |
| Mouse <i>Il1b</i> Forward 5'-CTGTGACTCATGGGATGATGATG-3'                     |
| Mouse <i>Il1b</i> Reverse 5'-CGGAGCCTGTAGTGCAGTTG-3'                        |
| Human <i>TNFA</i> Forward 5'-CCTCTCTCTAATCAGCCCTCTG-3'                      |
| Human <i>TNFA</i> Reverse 5'-GAGGACCTGGGAGTAGATGAG-3'                       |
| Mouse <i>Tnfa</i> Forward 5'-CCTGTAGCCACGTCGTAG-3'                          |
| Mouse <i>Tnfa</i> Reverse 5'-GGGAGTAGACAAGGTACAACCC-3'                      |
| Human <i>LTA</i> Forward 5'-ATGACACCACCTGAACGTCTC-3'                        |
| Human <i>LTA</i> Reverse 5'-CTCTCCAGAGCAGTGAGTTCT-3'                        |
| Human <i>IL6</i> Forward 5'-ACTCACCTCTTCAGAACGAATTG-3'                      |
| Human <i>IL6</i> Reverse 5'-CCATCTTTGGAAGGTTTCAGGTTG-3'                     |
| Mouse <i>Il6</i> Forward 5'-CTGCAAGAGACTTCCATCCAG-3'                        |
| Mouse <i>Il6</i> Reverse 5'-AGTGGTATAGACAGGTCTGTTGG-3'                      |
| Human <i>CCL2</i> Forward 5'-CAGCCAGATGCAATCAATGCC-3'                       |
| Human <i>CCL2</i> Reverse 5'-TGGAATCCTGAACCCACTTCT-3'                       |
| Mouse <i>Ccl2</i> Forward 5'-TTAAAAACCTGGATCGGAACCAA-3'                     |
| Mouse <i>Ccl2</i> Reverse 5'-GCATTAGCTTCAGATTACGGGT-3'                      |
| Human <i>CCL8</i> Forward 5'-TGGAGAGCTACACAAGAATCACC-3'                     |
| Human <i>CCL8</i> Reverse 5'-TGGTCCAGATGCTTCATGGAA-3'                       |
| Mouse <i>Ccl8</i> Forward 5'-TCTACGCAGTGCTTCTTTGCC-3'                       |
| Mouse <i>Ccl8</i> Reverse 5'-AAGGGGGATCTTCAGCTTTAGTA-3'                     |
| Human <i>CXCL8</i> Forward 5'-ACTGAGAGTGATTGAGAGTGGAC-3'                    |
| Human <i>CXCL8</i> Reverse 5'-AACCTCTGCACCCAGTTTTTC-3'                      |
| Human <i>IL6ST</i> Forward 5'-CGGACAGCTTGAACAGAATGT-3'                      |
| Human <i>IL6ST</i> Reverse 5'-ACCATCCCACTCACACCTCA-3'                       |
| Mouse <i>Il6st</i> Forward 5'-CCGTGTGGTTACATCTACCCT-3'                      |
| Mouse <i>Il6st</i> Reverse 5'-CGTGGTTCTGTTGATGACAGTG-3'                     |
| <i>IL6ST</i> -m <sup>6</sup> A site 1 Forward 5'-CTGTGGATCTGGGCAAATGAAAA-3' |

|                                                                            |
|----------------------------------------------------------------------------|
| <i>IL6ST</i> -m <sup>6</sup> A site 1 Reverse 5'-ACTGCTGAAGTTGTAGCAGGA-3'  |
| <i>IL6ST</i> -m <sup>6</sup> A site 2 Forward 5'-AAGCCTTTTCCAGAAGATCTGA-3' |
| <i>IL6ST</i> -m <sup>6</sup> A site 2 Reverse 5'-ACTGGACAGTGCTCGAAGTG-3'   |
| <i>IL18R1</i> -m <sup>6</sup> A site Forward 5'-GTGGACTCCATGAAGCATTGG-3'   |
| <i>IL18R1</i> -m <sup>6</sup> A site Reverse 5'-GGGGCAAGAATGTGAAGTCAG-3'   |
| <i>IL15RA</i> -m <sup>6</sup> A site Forward 5'-CTGCTCTGCACACATGGACA-3'    |
| <i>IL15RA</i> -m <sup>6</sup> A site Reverse 5'-TCAATGGAGAGGATTCGCTGG-3'   |

**Supplementary Table 4. List of reagents and resources used in this study**

| REAGENT or RESOURCE                           | SOURCE        | IDENTIFIER                     |
|-----------------------------------------------|---------------|--------------------------------|
| <b>Antibodies</b>                             |               |                                |
| p65                                           | CST           | Cat# 8242                      |
| Phospho-p65                                   | CST           | Cat# 3033                      |
| p38                                           | CST           | Cat# 8690                      |
| Phospho-p38                                   | CST           | Cat# 4511                      |
| STAT3                                         | CST           | Cat# 9139                      |
| Phospho-STAT3                                 | CST           | Cat# 9145                      |
| GFP                                           | CST           | Cat# 2555                      |
| METTL14                                       | CST           | Cat# 51104                     |
| m <sup>6</sup> A antibody                     | CST           | Cat# 56593                     |
| WTAP                                          | Abcam         | Cat# ab195380                  |
| WTAP (mouse monoclonal/<br>rabbit polyclonal) | Proteintech   | Cat# 60188-1-Ig/<br>10200-1-AP |
| METTL3                                        | Proteintech   | Cat# 15073-1-AP                |
| VCL                                           | Proteintech   | Cat# 66305-1-Ig                |
| JAK1                                          | Proteintech   | Cat# 66466-1-AP                |
| JAK2                                          | Proteintech   | Cat# 17670-1-AP                |
| IL6R                                          | Proteintech   | Cat# 23457-1-AP                |
| YTHDF1                                        | Proteintech   | Cat# 17479-1-AP                |
| GAPDH                                         | Proteintech   | Cat# 10494-1-AP                |
| β-actin                                       | Proteintech   | Cat# 66009-1-Ig                |
| Flag                                          | Proteintech   | Cat# 66008-4-Ig                |
| HA                                            | Proteintech   | Cat# 66006-2-Ig                |
| Goat anti-Mouse IgG                           | Proteintech   | Cat# SA00001-1                 |
| Goat anti-Rabbit IgG                          | Proteintech   | Cat# SA00001-2                 |
| TYK2                                          | Abclonal      | Cat# A2128                     |
| IL6ST                                         | Abclonal      | Cat# A14656                    |
| IL18R1                                        | Abclonal      | Cat# A21208                    |
| IL15RA                                        | Abclonal      | Cat# A2983                     |
| YTHDF2                                        | Abclonal      | Cat# A15616                    |
| YTHDF3                                        | Abclonal      | Cat# A8395                     |
| Goat anti-Rabbit IgG, Alexa Fluor™ 488        | Thermo Fisher | Cat# A-11008                   |
| Goat anti-Mouse IgG, Alexa Fluor™ 488         | Thermo Fisher | Cat# A-10680                   |
| Goat anti-Rabbit IgG, Alexa Fluor™ 568        | Thermo Fisher | Cat# A-11011                   |
| <b>Reagents</b>                               |               |                                |
| LPS (From E. coli O111:B4)                    | InvivoGen     | Cat# tlr1-eb1ps                |
| Pam3CSK4                                      | InvivoGen     | Cat# tlr1-pms                  |
| CL097                                         | InvivoGen     | Cat# tlr1-c97                  |
| HKST                                          | InvivoGen     | Cat# tlr1-hkst2                |
| HKLM                                          | InvivoGen     | Cat# tlr1-hklm                 |

|                                                                            |                                                      |               |
|----------------------------------------------------------------------------|------------------------------------------------------|---------------|
| PG490                                                                      | Selleck                                              | Cat# S3604    |
| SN50                                                                       | Selleck                                              | Cat# S6671    |
| SC144                                                                      | Selleck                                              | Cat# S7124    |
| STM2457                                                                    | Selleck                                              | Cat# S9870    |
| Lipofectamine 2000                                                         | Thermo Fisher                                        | Cat# 11668019 |
| Lipofectamine 3000                                                         | Thermo Fisher                                        | Cat# L3000015 |
| Lipofectamine RNAiMAX                                                      | Thermo Fisher                                        | Cat# 13778030 |
| High Capacity Streptavidin Agarose Resin                                   | Thermo Fisher                                        | Cat# 20359    |
| Recombinant Murine M-CSF                                                   | PeproTech                                            | Cat# 315-02   |
| PMA                                                                        | Sigma-Aldrich                                        | Cat# P1585    |
| Actinomycin D                                                              | Sigma-Aldrich                                        | Cat# A1410    |
| Brefeldin A                                                                | Sigma-Aldrich                                        | Cat# B5936    |
| Methylene blue                                                             | Sigma-Aldrich                                        | Cat# M9140    |
| Protein G Sepharose                                                        | Abcam                                                | Cat# ab193259 |
| TRIzol reagent                                                             | Invitrogen                                           | Cat# 15596026 |
| <b>Experimental models: Organisms/strains</b>                              |                                                      |               |
| <i>LyzM-Cre<sup>+</sup> Wtap<sup>Δ1-77</sup></i> mice (C57BL/6 background) | Generated for this study by Gempharmatech Co., Ltd.. | N/A           |
| <i>Pseudomonas aeruginosa</i>                                              | ATCC                                                 | ATCC27853     |
| <i>Listeria monocytogenes</i>                                              | ATCC                                                 | ATCC19116     |
| <b>Experimental models: Cell lines</b>                                     |                                                      |               |
| HEK293T cells                                                              | ATCC                                                 | N/A           |
| HeLa cells                                                                 | ATCC                                                 | N/A           |
| THP-1 cells                                                                | ATCC                                                 | N/A           |
| <i>WTAP<sup>Δ1-20</sup></i> THP-1 cells                                    |                                                      |               |
| <i>WTAP<sup>Δ1-77</sup></i> THP-1 cells                                    | This paper                                           | N/A           |
| <i>WTAP<sup>Δ1-20</sup></i> HEK293T cells                                  | This paper                                           | N/A           |
| <i>IL6ST<sup>-/-</sup></i> THP-1 cells                                     | This paper                                           | N/A           |
| <i>YTHDF1<sup>-/-</sup></i> THP-1 cells                                    | This paper                                           | N/A           |
| <i>YTHDF3<sup>-/-</sup></i> THP-1 cells                                    | This paper                                           | N/A           |
| <b>Oligonucleotides</b>                                                    |                                                      |               |
| Primers used for qRT-PCR experiments, see Table S2                         | This paper                                           | N/A           |
| siRNA and sgRNA sequences, see Table S2                                    | This paper                                           | N/A           |
| <b>Critical commercial assays</b>                                          |                                                      |               |
| PrimeScript <sup>TM</sup> RT reagent kit with gDNA Eraser                  | TaKaRa                                               | Cat# RR047A   |
| <i>Evo M-MLV</i> RT Mix Kit with gDNA Clean for qPCR                       | AG                                                   | Cat# AG11728  |
| 2× RealStar Power SYBR qPCR Mix                                            | GenStar                                              | Cat# A311-01  |
| 2×Polarsignal® qPCR mix                                                    | MIKX                                                 | Cat# MKG802   |
| Human IL-1 beta Quantikine ELISA Kit                                       | R&D Systems                                          | Cat# DLB50    |
| Human TNF-alpha Quantikine QuicKit ELISA                                   | R&D Systems                                          | Cat# QK210    |
| Human IL-6 ELISA Kit                                                       | Proteintech                                          | Cat# KE00139  |

|                                                                      |                 |                |
|----------------------------------------------------------------------|-----------------|----------------|
| Mouse IL-6 ELISA Kit                                                 | Proteintech     | Cat# KE10007   |
| Dual-Luciferase <sup>®</sup> Reporter Assay System                   | Promega         | Cat# E1960     |
| RIP-Assay Kit                                                        | MBL             | Cat# RN1001    |
| RNeasy Mini Kit                                                      | QIAGEN          | Cat# 74104     |
| Magna MeRIP m <sup>6</sup> A Kit                                     | Merck Millipore | Cat# 17-10499  |
| EpiQuik m <sup>6</sup> A RNA Methylation Quantification Kit          | EpiGentek       | Cat# P-9005-48 |
| <b>Recombinant DNA</b>                                               |                 |                |
| Plasmid: pGL3 basic                                                  | Lab stock       | N/A            |
| Plasmid: psiCHECK <sup>TM</sup> -2                                   | Lab stock       | N/A            |
| Plasmid: pEGFP-N1                                                    | Lab stock       | N/A            |
| Plasmid: pET-32a-GFP/mCherry                                         | Lab stock       | N/A            |
| Plasmid: lentiCRISPR v2                                              | Lab stock       | N/A            |
| Plasmid: psPAX2                                                      | Lab stock       | N/A            |
| Plasmid: pVSV-G                                                      | Lab stock       | N/A            |
| Plasmid: pcDNA3.1-FLAG                                               | Lab stock       | N/A            |
| Plasmid: pcDNA3.1-mCherry                                            | Lab stock       | N/A            |
| Plasmid: pcDNA3.1-FLAG-C/EBP $\beta$                                 | This paper      | N/A            |
| Plasmid: pcDNA3.1-FLAG-IRF3                                          | This paper      | N/A            |
| Plasmid: pcDNA3.1-FLAG-p65                                           | This paper      | N/A            |
| Plasmid: pcDNA3.1-FLAG-WTAP                                          | This paper      | N/A            |
| Plasmid: pcDNA3.1-mCherry-METTL3                                     | This paper      | N/A            |
| Plasmid: pGL3 basic-WTAP promoter-2250 bp                            | This paper      | N/A            |
| Plasmid: pGL3 basic-WTAP promoter-900 bp                             | This paper      | N/A            |
| Plasmid: pGL3 basic-WTAP promoter-p65/IRF3                           | This paper      | N/A            |
| Plasmid: pGL3 basic-WTAP promoter-C/EBP $\beta$                      | This paper      | N/A            |
| Plasmid: pGL3 basic-WTAP promoter-p65-Del                            | This paper      | N/A            |
| Plasmid: pGL3 basic-WTAP promoter-p65-Mut                            | This paper      | N/A            |
| Plasmid: pGL3 basic-Wtap promoter-2190 bp                            | This paper      | N/A            |
| Plasmid: psiCHECK <sup>TM</sup> -2-IL6ST WT m <sup>6</sup> A motif   | This paper      | N/A            |
| Plasmid: psiCHECK <sup>TM</sup> -2-IL6ST Mut m <sup>6</sup> A motif  | This paper      | N/A            |
| Plasmid: psiCHECK <sup>TM</sup> -2-IL18R1 WT m <sup>6</sup> A motif  | This paper      | N/A            |
| Plasmid: psiCHECK <sup>TM</sup> -2-IL18R1 Mut m <sup>6</sup> A motif | This paper      | N/A            |
| Plasmid: psiCHECK <sup>TM</sup> -2-IL15RA WT m <sup>6</sup> A motif  | This paper      | N/A            |
| Plasmid: psiCHECK <sup>TM</sup> -2-IL15RA Mut m <sup>6</sup> A motif | This paper      | N/A            |
| Plasmid: pET-32a-GFP-WTAP                                            | This paper      | N/A            |
| Plasmid: pET-32a-mCherry-METTL3                                      | This paper      | N/A            |
| Plasmid: pEGFP-N1-WTAP <sup>CDS</sup>                                | This paper      | N/A            |
| Plasmid: pEGFP-N1-WTAP <sup>1-204</sup>                              | This paper      | N/A            |
| Plasmid: pEGFP-N1-WTAP <sup>204-396</sup>                            | This paper      | N/A            |
| Plasmid: pEGFP-N1-WTAP <sup><math>\Delta</math>204-225</sup>         | This paper      | N/A            |
| Plasmid: pEGFP-N1-WTAP <sup><math>\Delta</math>225-287</sup>         | This paper      | N/A            |
| Plasmid: pEGFP-N1-WTAP <sup><math>\Delta</math>289-387</sup>         | This paper      | N/A            |
| Plasmid: pEGFP-N1-WTAP <sup><math>\Delta</math>1-20</sup>            | This paper      | N/A            |

|                                         |            |     |
|-----------------------------------------|------------|-----|
| Plasmid: pEGFP-N1-WTAP <sup>Δ1-77</sup> | This paper | N/A |
| Plasmid: pCDH-CMV                       | This paper | N/A |
| Plasmid: pCDH-CMV-WTAP-Flag             | This paper | N/A |
